1 Title: Rainforest-to-pasture conversion stimulates soil methanogenesis across the Brazilian  
2 Amazon

3  
4 Marie E. Kroeger<sup>1\*</sup>, Laura K. Meredith<sup>2,3</sup>, Kyle M. Meyer<sup>4,10</sup>, Kevin D. Webster<sup>5</sup>, Plinio  
5 Barbosa de Camargo<sup>6</sup>, Leandro Fonseca de Souza<sup>6</sup>, Siu Mui Tsai<sup>6</sup>, Joost van Haren<sup>3,7</sup>, Scott  
6 Saleska<sup>8</sup>, Brendan J.M. Bohannan<sup>4</sup>, Jorge L.M. Rodrigues<sup>9</sup>, Klaus Nüsslein<sup>1#</sup>

7  
8 1. Department of Microbiology, University of Massachusetts Amherst, Amherst, MA, USA

9 2. School of Natural Resources and the Environment, University of Arizona, Tucson, AZ, USA

10 3. Biosphere 2, University of Arizona, Tucson, AZ, USA

11 4. Institute of Ecology and Evolution, University of Oregon, Eugene, OR, USA

12 5. Planetary Science Institute, Tucson, AZ, USA

13 6. Center for Nuclear Energy in Agriculture, University of São Paulo, SP, Brazil

14 7. Honors College, University of Arizona, Tucson, AZ, USA

15 8. Department of Ecology and Evolutionary Biology, University of Arizona, Tucson, AZ, USA

16 9. Department of Land, Air and Water Resources, University of California Davis, CA, USA

17 10. Department of Integrative Biology, University of California – Berkeley, Berkeley, CA, USA

18 \*Current address: Bioenergy and Biome Sciences, Los Alamos National Laboratory, Los  
19 Alamos, NM, USA

20 # Author for correspondence: [nusslein@microbio.umass.edu](mailto:nusslein@microbio.umass.edu)

21

22 Running Title: Tropical deforestation stimulates methanogenesis

23

24 ABSTRACT

25 The Amazon rainforest is a biodiversity hotspot and large terrestrial carbon sink that is  
26 threatened by agricultural conversion. Rainforest-to-pasture conversion leads to the release of a  
27 potent greenhouse gas by converting soil from a methane sink into a source. The biotic methane  
28 cycle is driven by microorganisms; therefore, this study focused on active methane-cycling  
29 microorganisms and their functions across land-use types. We collected intact soil cores from  
30 three land use types (primary rainforest, pasture, and secondary rainforest) of two geographically  
31 distinct areas of the Brazilian Amazon (Santarém, Pará and Ariquemes, Rondônia) and  
32 performed DNA stable-isotope probing coupled with metagenomics to identify the active  
33 methanotrophs and methanogens. At both locations, we observed a significant change in the  
34 composition of the isotope-labeled methane-cycling microbial community across land use types,  
35 specifically an increase in the abundance and diversity of active methanogens in pastures. We  
36 conclude that a significant increase in the abundance and activity of methanogens in pasture soils  
37 could explain the greater methane flux. Furthermore, we found that secondary rainforests  
38 recovered as methane sinks, indicating the potential for reforestation to offset greenhouse gas  
39 emissions in the tropics. These findings are critical for informing land management practices and  
40 global tropical rainforest conservation.

41 INTRODUCTION

42 Climate change, caused by the anthropogenic release of greenhouse gases<sup>1</sup>, is affecting  
43 every ecosystem on Earth. Although the majority of greenhouse gases released to the atmosphere  
44 are associated with the industrial revolution and fossil fuel combustion, land use change is a  
45 significant contributor. Specifically, tropical deforestation in the last decade has released ~1 Pg  
46 C yr<sup>-1</sup>, an equivalent to 10% of anthropogenic carbon dioxide emissions<sup>1</sup>, and 78% of total

47 greenhouse gas emissions in Brazil are caused by land use change<sup>2-3</sup>. In addition to being  
48 biodiversity hotspots of plants and animals, tropical rainforests are large terrestrial carbon sinks.  
49 However, rainforest deforestation to create cattle pastures or agricultural fields releases large  
50 amounts of stored carbon, converting former terrestrial carbon sinks into major carbon sources<sup>3-4</sup>.  
51 In the Amazon rainforest particularly, over 1 Mha of forest has been lost in 2017 alone<sup>5</sup>. The  
52 conversion of primary rainforest (i.e. mature rainforest older than 150 years) to cattle pasture is a  
53 main cause of deforestation in Brazil and not only changes plant diversity but also the  
54 microorganisms that drive soil biogeochemical cycling<sup>6</sup>.

55         The methane (CH<sub>4</sub>) biogeochemical cycle is of interest because of its potency as a  
56 greenhouse gas with 86-times the global warming potential of carbon dioxide over a 20-year  
57 timescale<sup>1</sup>. Biotic CH<sub>4</sub> cycling is controlled by microorganisms, specifically methanogenic  
58 archaea that produce CH<sub>4</sub>, and methanotrophic bacteria that consume CH<sub>4</sub><sup>7-8</sup>. The balance  
59 between these two functional groups determines whether the soil acts as a CH<sub>4</sub> source or sink.  
60 Under anoxic conditions, soil methanogenic archaea generally metabolize fermentation products  
61 such as acetate (acetoclastic methanogenesis) or reduce carbon dioxide with hydrogen  
62 (hydrogenotrophic methanogenesis) to produce CH<sub>4</sub><sup>9-11</sup>. Methanotrophs are commonly aerobic  
63 bacteria located at anoxic/oxic boundaries from either *Gammaproteobacteria*,  
64 *Alphaproteobacteria*, or *Verrucomicrobia*, corresponding to Type I, II, and III methanotrophs,  
65 respectively<sup>12-13</sup>. Previous research into the different growth conditions of Type I versus Type II  
66 methanotrophs found that Type II methanotrophs generally dominate high CH<sub>4</sub>, low oxygen  
67 environments along with nitrogen- and copper-limiting conditions<sup>14-16</sup>. However, Type II  
68 methanotrophs have also been found in soils with low CH<sub>4</sub> concentrations<sup>17-19</sup> likely due to two

69 isoenzymes of the particulate methane monooxygenase that have different affinities for CH<sub>4</sub><sup>20</sup>  
70 making them more versatile metabolically.

71 Researchers have focused on the impact of rainforest-to-pasture conversion on CH<sub>4</sub>  
72 cycling for decades<sup>21-23</sup>. Measurements of in-field gas flux generally show soil CH<sub>4</sub> consumption  
73 across seasons in mature rainforest, while pasture soils emit CH<sub>4</sub><sup>24-25</sup>. Over the last decade,  
74 further research into how tropical land use change influences CH<sub>4</sub> cycling microorganisms found  
75 varied results. One study observed that the functional biomarkers for methanotrophy (*pmoA* and  
76 *mmoX*) decreased in cattle pastures with no change to the methanogenesis biomarker (*mcrA*),  
77 while another study observed a decrease in *pmoA* abundance from Type II methanotrophs and an  
78 increase in *mcrA* in cattle pastures<sup>6,19</sup>. These previous studies investigated how land use change  
79 in the Brazilian Amazon impacts the genomic potential of the soil methane-cycling microbial  
80 community, but no study has directly targeted the active community.

81 Metatranscriptomics, metaproteomics, and stable isotope probing are increasingly  
82 common techniques to target the active microorganisms in an environmental sample<sup>26-29</sup>.  
83 Previous research by our group using metatranscriptomics and metaproteomics was unable to  
84 determine if soil CH<sub>4</sub> cycling genes and proteins were differentially expressed between land use  
85 types due to low counts (unpublished data). Therefore, for this study we used stable isotope  
86 probing to determine the active fraction of the soil microbial community cycling CH<sub>4</sub>, referred to  
87 henceforth as members of the active community. Stable isotope probing is commonly applied to  
88 study CH<sub>4</sub> cycling in soil given the specific nature of the substrate and its relevance to climate  
89 change<sup>30-32</sup>. This technique uses the less abundant isotope of an atom, such as <sup>13</sup>C-carbon, to  
90 label the microorganisms capable of consuming the <sup>13</sup>C and, via their anabolic metabolism,  
91 incorporating it into their DNA, which then can be separated by ultracentrifugation from the

92 community DNA. Subsequently, next generation sequencing enables the identification of active  
93 community members and provides insight into their functional potential.

94         The central goal of this study was to determine how the members of the active CH<sub>4</sub>-  
95 cycling microbial community, their functions, and CH<sub>4</sub>-related metabolic pathways changed  
96 across land use types (primary rainforest, cattle pasture, and secondary rainforest) and  
97 geographically distinct regions of the Brazilian Amazon. We hypothesized that the cause of  
98 increased soil methane production in cattle pastures was caused by a decrease in active  
99 methanotrophy. To test this hypothesis, we sampled sites at the most active deforestation  
100 frontiers in northeastern and southwestern Amazonia in the states of Pará (Tapajós National  
101 Forest) and Rondônia (Fazenda Nova Vida), respectively. To determine the community  
102 composition and functions of the active methane-cycling microorganisms, we coupled stable  
103 isotope probing (DNA-SIP) with metagenomics, using either <sup>13</sup>C-labeled methane (CH<sub>4</sub>), carbon  
104 dioxide (CO<sub>2</sub>), or sodium acetate (NaAOC) as a substrate. Overall, we observed significant shifts  
105 in the active microbial community compositions and their methane-cycling functional genes  
106 between land-use types, geographic location, and substrates. Specifically, the abundance and  
107 diversity of active methanogens increased with conversion to pasture. Ultimately, this significant  
108 increase in active methanogens in pasture soils significantly correlated with the in-field methane  
109 gas flux. Therefore, we conclude that an increased abundance and diversity of active  
110 methanogens is causing the overall net positive methane flux in cattle pastures.

111

## 112 METHODS

113 Site description and sampling: At each sampling site, we first took soil gas flux measurements as  
114 detailed below, followed by collecting 5 to 6 soil cores. Seventy-two soil cores (5 cm diameter ×

115 10 cm depth) were collected from the Tapajós National Forest and its adjacent areas in the State  
116 of Pará in June 2016 for DNA-SIP. Another 72 soil cores were collected from Fazenda Nova  
117 Vida and its adjacent areas in the State of Rondônia in April 2017 for DNA-SIP (GPS  
118 coordinates in Supplemental Methods). For each location, 18 soil cores were collected from each  
119 land use type, two primary rainforests (PF1 or PF2), one cattle pasture (P), and one secondary  
120 rainforest (SF). Soil cores were collected along a transect ranging from 100 to 200 meters with  
121 five equidistant sampling points. Three adjacent soil cores were taken from each sampling point  
122 with a fourth soil core taken from sampling points 2, 3, and 4 along the transect (Supplemental  
123 Figure 1). The cores were stored at 4°C until incubation with stable isotopes in the laboratory (up  
124 to 2 weeks later due to travel). The two additional soil cores collected at each sampling point  
125 were immediately homogenized, and then divided into two volumes for total prokaryotic  
126 community analyses from extracted DNA and for soil physical-chemical characterization.

127

128 Stable isotope probing: During incubation with stable isotopes, the intact soil cores (~200 g  
129 depending on soil density) were stored in gas-tight glass jars in the dark. For each combination  
130 of location (Pará or Rondônia) and transects across land use type (two primary rainforests, one  
131 pasture, one secondary rainforest), five soil cores were incubated with  $^{13}\text{C}$ -substrate and one  
132 additional core with  $^{12}\text{C}$ -substrate as the control. For each sampling site this resulted in a total of  
133 six cores for each of the three substrates, or 72 cores total for each location tested. Soils were  
134 incubated at 25°C for ~7 months due to the low gas exchange at the surface top of the  
135 undisturbed soil column (20 cm<sup>2</sup>) compared to homogenized soil (20-32x lower rates;  
136 unpublished data). Either 25 mL of  $^{13}\text{C}$ -carbon dioxide (3% headspace concentration), 1 mL of  
137  $^{13}\text{C}$ -sodium acetate (1 mM final concentration, added to the top of each soil core), or 25 mL of

138  $^{13}\text{C}$ -methane (3% headspace concentration) were added every two weeks. Equal volumes (1 mL)  
139 of sterile water were added to carbon dioxide and methane incubations. Air was added once a  
140 week to the  $^{13}\text{C}$ -methane incubations to ensure an oxic headspace. Pressure was released  
141 periodically prior to substrate injection from all jars. The duration of incubation was determined  
142 by monitoring the methane gas flux and attempting to ensure 20 mM of substrate was  
143 incorporated, following published recommendations to apply 5-500  $\mu\text{M}$   $^{13}\text{C}$  per g of soil<sup>33</sup>. Our  
144 target was to incorporate  $\sim 100$   $\mu\text{M}$   $^{13}\text{C}$  per g of soil, rendering shorter incubation times  
145 insufficient. Methane production or consumption was monitored throughout the incubation  
146 experiment by gas chromatography (Shimadzu GC-17A, Kyoto, Japan). After incubation, each  
147 soil core was sectioned longitudinally into five 2-cm tall segments (numbered 1-5 from top to  
148 bottom) and stored frozen at  $-20^\circ\text{C}$  until DNA extraction.

149  
150 DNA extraction, quantification, and sample processing: DNA was extracted from 0.25 g of soil  
151 from all segments from two of the five  $^{13}\text{C}$  soil cores using the DNeasy PowerSoil DNA  
152 Extraction kit (Qiagen, Hilden, Germany) to determine the segment with the highest abundance  
153 of methanogens or methanotrophs based on the respective functional marker genes using qPCR  
154 as described below. Upon identifying the segment with the highest genomic abundance of  
155 methanogens or methanotrophs, DNA was extracted from 4 g of soil from the identified segment  
156 of three  $^{13}\text{C}$  soil cores and from the  $^{12}\text{C}$ -control for each substrate/sample site combination using  
157 the DNeasy PowerMax Soil Kit (Qiagen). DNA was quantified fluorometrically using the Qubit  
158 dsDNA Broad-Range assay (Invitrogen, Carlsbad, CA). A total of 5  $\mu\text{g}$  of DNA was subjected to  
159 ultracentrifugation according to a previously described protocol<sup>33</sup>, followed by fractionation of  
160 the density gradient into 12 fractions of equal volume. The continuity of the density gradient was

161 confirmed with a refractometer. DNA was precipitated following the published protocol<sup>33</sup> except  
162 for the addition of 20 µg linear acrylamide (Invitrogen) instead of glycogen and each fraction  
163 was quantified using fluorometry via the Qubit dsDNA High-Sensitivity assay (Invitrogen). To  
164 identify the fractions with <sup>13</sup>C-labeled DNA, we quantified the abundance of methanogens or  
165 methanotrophs in each fraction using qPCR of the respective functional gene marker for a subset  
166 of samples compared to their respective <sup>12</sup>C-controls (details in Supplementary Methods). We  
167 pooled the <sup>12</sup>C (~1-5) and <sup>13</sup>C (~6-12) fractions, respectively. Since the GC content of microbial  
168 DNA can influence DNA density, we sequenced both the light and heavy DNA fractions from  
169 our <sup>12</sup>C-controls for a total of 12 <sup>12</sup>C-light DNA, 12 <sup>12</sup>C-heavy DNA, and 36 <sup>13</sup>C-heavy DNA  
170 samples per location.

171  
172 Quantitative PCR: The particulate methane monooxygenase alpha subunit gene (*pmoA*) was  
173 amplified using the primer pair A189f/mb661r<sup>34-35</sup>, and the gene for the methyl coenzyme M  
174 reductase alpha subunit (*mcrA*) was amplified using the primer pair mlas/mcra-rev<sup>36</sup>. Standard  
175 reaction mixtures and thermocycler conditions are specified in Supplemental Methods.

176  
177 Sequencing: All DNA library preparation and sequencing were performed at the University of  
178 Oregon Genomics and Cell Characterization Core Facility (Eugene, OR) (Supplementary  
179 Methods). Briefly, the three genes of interest (16S rRNA, *pmoA*, and *mcrA*) were amplified using  
180 custom dual-indexed PCR primers designed by the core facility. For each location, paired-end  
181 300 bp amplicon sequencing of the pooled heavy fractions for three <sup>13</sup>C-samples per sample  
182 site/substrate combination and the pooled heavy and light fractions for all <sup>12</sup>C-controls was  
183 completed on an Illumina MiSeq sequencer (Illumina, San Diego, CA). For metagenomes,



184 sequencing of the heavy fraction of two  $^{13}\text{C}$ -samples per sampling site/substrate combination and  
185 all  $^{12}\text{C}$ -controls was performed on an Illumina HiSeq4000 across two flow lanes for each  
186 location. All sequences were demultiplexed at the core facility.

187

188 Soil physical-chemical analysis: Homogenized soil samples stored at 4°C were processed as  
189 described in detail previously<sup>37</sup>.

190

191 Methane Gas Flux Measurements: In-field soil  $\text{CH}_4$  fluxes were measured using a field-  
192 deployable Fourier transform infrared spectrometer (Gaset, DX 4015, Vantaa, Finland)  
193 sampling a recirculating flow-through soil flux chamber placed on soil collars (aluminum, inner  
194 area of 284  $\text{cm}^2$ ) that were installed in soil (5 cm deep) at least 20 minutes beforehand. Fluxes  
195 were calculated from the rate of headspace  $\text{CH}_4$  accumulation or depletion in a 30-minute period.  
196 We fit linear models to concentration vs. time trends, limiting the extend of the time series used  
197 to the initial linear decline in cases when nonlinear behavior was observed at late stages in the  
198 measurement<sup>38-39</sup>.

199

200 Data and statistical analysis: Amplicon sequences were processed and analyzed using the  
201 DADA2 pipeline in QIIME2<sup>40-41</sup>. Metagenome sequences were processed and annotated using  
202 MG-RAST<sup>42</sup>. GenBank and SEED Subsystem were used for the organismal and functional  
203 annotations, respectively. The SEED Subsystem annotation “Methanogenesis strays” is  
204 described as “several additional genes and clusters from methanogens.” The influence of  
205 homogeneous dispersion within each sample and heterogeneous dispersion between samples was  
206 assessed using the Permdisp and Adonis functions, respectively, from the ‘vegan’ package in R

207 on dissimilarity matrices made from the annotation tables<sup>43-44</sup>. To specifically target the active  
208 microbial community, the metagenomic annotations were rarefied (vegan:rrarefy) and counts  
209 were normalized to the <sup>12</sup>C-control for each substrate (see Supplementary Methods). After  
210 rarefaction, the dissimilarity between land use types within each substrate were analyzed  
211 (vegan:Adonis). STAMP v2.1.3 was then used to identify active microorganisms and functions  
212 by comparing each individual <sup>13</sup>C-sample to their respective <sup>12</sup>C-control using Fisher's exact  
213 test<sup>45</sup>. All figures were made in R v3.5.1 using ggplot2<sup>43,46</sup>. Soil physical-chemical data were  
214 analyzed using ANOVA with a Tukey-Kramer post-hoc test. Correlation analyses between the  
215 in-field methane flux and the abundance of active methane-cycling taxa or functional annotations  
216 were completed using a Pearson correlation (cor.test)<sup>43</sup>.

217

218 *Active Fraction Analysis:* In this study, “active” means that the cells were actively growing  
219 (anabolically incorporating <sup>13</sup>C) and not just metabolically active (catabolic turnover of <sup>13</sup>C  
220 substrate independent of growing). The incubations with <sup>13</sup>C-labeled substrates determine both  
221 actively growing and metabolically active community members, and we used our <sup>12</sup>C incubation  
222 controls to correct for the metabolically active part. Therefore, an annotation was deemed active,  
223 if it was significantly higher ( $p < 0.05$ ) in the <sup>13</sup>C-sample compared to the <sup>12</sup>C-control. Samples  
224 were normalized to their respective <sup>12</sup>C-control with features that had less abundance in the <sup>13</sup>C-  
225 than <sup>12</sup>C-samples being marked as 0 counts. Samples from the same substrate were compared  
226 between land use types in STAMP using the multigroup stats function (ANOVA with Tukey-  
227 Kramer Post-hoc test). All significantly different annotations were checked again to see if they  
228 were active in the samples.

229

230 Data Accessibility: Metagenomes are available publicly on MG-RAST under the following  
231 project accession numbers: mgp88468 and mgp86794. All raw amplicon sequence files have  
232 been deposited on figshare under the following DOI: 10.6084/m9.figshare.10565552,  
233 10.6084/m9.figshare.10565690, 10.6084/m9.figshare.10565870, 10.6084/m9.figshare.10565897,  
234 10.6084/m9.figshare.10565957, 10.6084/m9.figshare.10565801.

235

236

## 237 RESULTS AND DISCUSSION

238

### 239 Active Methane-Cycling Community Changes with Land-Use

240 To understand the active methane-cycling microbial community composition and  
241 abundance, we analyzed sequences of both PCR-amplified marker genes (16S rRNA, *mcrA*, and  
242 *pmoA*) and metagenomes. The amplification-based approach makes our data comparable to many  
243 microbial studies that use these biomarkers, but this method comes with the potential issues of  
244 primer bias allowing for missed taxonomic groups, lower phylogenetic resolution, and no  
245 additional information on ecosystem processes<sup>47-48</sup>. Therefore, after confirming that enough label  
246 was present in the target sample using amplicon-based sequencing, we used metagenomics to  
247 gain a deeper understanding of the <sup>13</sup>C-labeled methane-cycling community and its supporting  
248 members<sup>49-51</sup>. The composition of the total soil microbial community, based on 16S rRNA,  
249 significantly differed between geographic locations (Rondônia vs Pará;  $p=1e-03$   $r^2=0.118$ ),  
250 individual land-use types (primary rainforest(PF), pasture(P), secondary rainforest(SF),  $p=1e-03$   
251  $r^2=0.08$ ), and added substrates (CH<sub>4</sub>, CO<sub>2</sub>, NaAOC,  $p=1e-03$   $r^2=0.08$ ) (Figure 1). When we  
252 specifically targeted the active community, we found that only samples incubated with CO<sub>2</sub>

253 significantly differed between locations (Pará CO<sub>2</sub> p=3e-03; Rondônia CO<sub>2</sub> p=1.8e-02;  
254 Supplemental Figures 2-3). It was unsurprising that location is the main driver to differentiate the  
255 total microbial community since Rondônia and Pará are separated by ~1500 km. Also, abiotic  
256 factors such as seasonal differences and/or soil physical-chemical properties could be driving  
257 these locational differences<sup>52-54</sup>. The significant differences in CO<sub>2</sub> incubated samples may be  
258 due to the similarity of the overall active community across samples, while the methane-  
259 consuming or -producing community makes up only a small fraction of that community and the  
260 signal is lost when we look at the community composition broadly.

261         When we investigated the richness of active methane-cycling communities, we found that  
262 pasture samples had the highest active methanogen richness in metagenomes from both locations  
263 and regardless of substrate (CO<sub>2</sub> or NaAOc); however, it was only significant in Rondônia  
264 NaAOc samples (P vs PF p=9.6e-03, P vs SF p=7.9e-03; Figure 2, Supplemental Table 1). All  
265 active methanogens that significantly changed abundance between land-use types were  
266 associated with pasture soils in both locations (Table 1). Specifically, *Methanosarcina* spp.  
267 dominated the active methanogens for most samples in both locations regardless of substrate  
268 (Figure 3, Supplemental Tables 2-3; 5-6). These archaeal species are known to have multiple  
269 methanogenesis pathways making them capable of utilizing both <sup>13</sup>CO<sub>2</sub> and <sup>13</sup>NaAOc, likely  
270 explaining their dominance in both locations and substrates<sup>55-58</sup>.

271         We observed a significantly higher abundance of total active methanogens in Rondônia  
272 pasture soils compared to both primary and secondary rainforest samples in <sup>13</sup>NaAOc samples  
273 (p=1e-03, p=3.8e-02, respectively) and compared to secondary rainforest in <sup>13</sup>CO<sub>2</sub> samples  
274 (p=9e-03). There was no significant difference in the abundance of total active methanogens  
275 between land-use types for either methanogenic substrate in Pará, but many taxa did significantly

276 change abundance (Table 1). Previous research studies showed mixed findings on methanogen  
277 communities response to tropical land-use change ranging from no change to increased *mcrA*  
278 gene abundance in pastures<sup>59,6,19</sup>. By targeting the active community, we directly show that  
279 pasture soils have a higher richness of active methanogens and specific methanogenic taxa  
280 significantly increase abundance. This increase in methanogen abundance and richness is likely  
281 due to the increased soil carbon cycling occurring in pasture soils<sup>60-61</sup>.

282 Previous research into methanotrophy across Amazonian land uses found methanotroph  
283 abundance to be lower in pasture relative to primary forest soils<sup>6,59,19</sup>. Based on these studies, we  
284 hypothesized that pasture soils would have the lowest abundance and richness of active  
285 methanotrophs. Unlike the active methanogen community, we did not find a consistent  
286 association between active methanotroph richness and land-use types across locations. The  
287 highest richness was either found in pasture or secondary rainforest for Pará and Rondônia,  
288 respectively, but it was not significant (Figure 2). The total active methanotroph abundance did  
289 not significantly change between land-use types. In both locations and all land-use types, Type II  
290 methanotrophs (Alphaproteobacteria) dominated the active methanotroph community (Figure 4,  
291 Supplemental Tables 4, 7). Only one primary rainforest sample from Pará was dominated by  
292 Type I methanotrophs and only one Type III methanotroph was found to be active,  
293 *Methylococcus*, but remained rare (Supplemental Tables 4, 7).

294 Although, the total abundance of active methanotrophs did not significantly change  
295 between land-use types, the abundance of specific methanotrophs changed in Pará and Rondônia  
296 associating with pasture and secondary rainforest, respectively (Table 1). This was surprising and  
297 not what we hypothesized based on previous studies<sup>6,19,59</sup>. Several factors should be considered  
298 to address this discrepancy. First, our study targeted the microorganisms actively consuming CH<sub>4</sub>

299 rather than looking at the total microbial community. Studies of the total microbial community  
300 can be influenced by the potential presence of extracellular DNA, which may affect estimates of  
301 abundance and diversity<sup>62-64</sup>. Additionally, we incubated our samples at CH<sub>4</sub> concentrations  
302 above those in the atmosphere due to the inability to label the community at low concentrations.  
303 Although necessary for the technique, this could influence the composition and activity of the  
304 CH<sub>4</sub>-consuming community. Furthermore, there is a possibility that we incorrectly assumed  
305 primary rainforests would have the highest methanotroph richness and abundance since these  
306 forests are known to be methane sinks<sup>21-22</sup>. Here, our findings enable the next question to test  
307 what environmental variables govern the active CH<sub>4</sub>-consuming community between land-use  
308 types in the Brazilian Amazon.

309

#### 310 Dominant Active Methanogenesis Pathways Differed Between Locations

311 We next asked which CH<sub>4</sub>-related metabolic pathways were active across land-use types  
312 and how they changed in response to deforestation. We observed active methanotrophy based on  
313 the abundance of the genes for particulate methane monooxygenase (*pmmo*) and soluble methane  
314 monooxygenase (*smmo*) in all <sup>13</sup>C-labeled samples and in both locations (Figure 5; Supplemental  
315 Table 8). The *pmmo* genes were abundant and active in 94% of samples while *smmo* was active  
316 in most secondary rainforest samples and Rondônia-PF1 (Figure 5; Supplemental Table 8). The  
317 secondary rainforest and pasture samples at Rondônia significantly increased in *pmmo*  
318 abundance (p=6e-03; p=3e-02, respectively) compared to primary rainforest (Supplemental  
319 Table 8). We found no significant difference in the abundance of any active methanotrophy-  
320 related genes across land-use types in Pará (Figure 5). Overall, Rondônia had a significantly  
321 higher relative abundance of *pmmo* to total methanotrophy annotations compared to Pará

322 (Supplemental Table 8) ( $p=1e-04$ ). Soil physical-chemical properties are known to influence the  
323 activity of these different methane monooxygenases<sup>65</sup>. Copper is a key component regulating the  
324 activity and abundance of these methane monooxygenases having a positive relationship with  
325 *pmmo* abundance<sup>66-67,12</sup>. We observed a significantly higher concentration of copper (9x) in  
326 Rondônia compared to Pará ( $p=7.42E-06$ ) which may explain the increased abundance of active  
327 *pmmo* genes.

328         Regardless of location, the abundance of active methanogenesis genes dominated in  
329 pasture compared to other land-use types. Interestingly, in Pará we observed these significant  
330 increases in the <sup>13</sup>CO<sub>2</sub> incubation, while in Rondônia the <sup>13</sup>NaAOC incubation accounted for the  
331 increased abundance (Figure 6; Supplemental Table 9). The Pará <sup>13</sup>NaAOC incubation presented  
332 some significant changes in methanogenesis-related genes including Coenzyme F420 synthesis  
333 ( $p=8e-05$ ), methanopterin biosynthesis2 ( $p=2e-03$ ), and methanogenesis strays ( $p=1e-03$ ). The  
334 two pasture samples in Pará <sup>13</sup>NaAOC incubations performed very differently. Although pastures  
335 are considered to be more biotically homogeneous<sup>68</sup>, these two samples differed strongly with  
336 one sample having about 8.5x more active methanogens (Supplemental Table 4). When the  
337 relative abundance of active methanogenesis genes to total annotations was investigated, we  
338 identified a significant difference between land-use types in the Pará <sup>13</sup>CO<sub>2</sub> incubations (PF v P  
339  $p=1e-03$ , SF v P  $p=1.8e-02$ ) and in the Rondônia <sup>13</sup>NaAOC incubations (PF v P  $p=7e-02$ , SF v P  
340  $p=1.8e-02$ ) (Supplemental Table 10). In addition to methanogenesis genes changing between  
341 land-use types, we observed an increase in carbon cycling activity in Pará pasture soils incubated  
342 with <sup>13</sup>CO<sub>2</sub> (Glycolysis and gluconeogenesis  $p=1e-03$ , Pentose phosphate pathway  $p=2e-03$ ,  
343 Entner-Doudoroff pathway  $p=3e-02$ ). Overall, we found that active methanogenesis was driven  
344 by methanogens using the hydrogenotrophic pathway in Pará and the acetoclastic pathway in

345 Rondônia (Supplemental Table 9). This shift in the dominant methanogenesis pathway between  
346 locations may be due to differences in the physical-chemical soil parameters or a result of the  
347 types of fermentation leading to either more acetate or hydrogen production. Interestingly, the  
348 active methanogen community was dominated by *Methanosarcina* spp. in both locations.  
349 Members of the genus *Methanosarcina* are known to require three different types of  
350 hydrogenases for the reduction of CO<sub>2</sub> to CH<sub>4</sub> with electrons derived from H<sub>2</sub><sup>58</sup>. The  
351 significantly increased activity of multiple types of hydrogenases (Energy conserving  
352 hydrogenase ferrodixin Ech p=1.6E-08; membrane bound hydrogenases p=4.6e-02; Archaeal  
353 membrane bound hydrogenases p=0.048; Coenzyme F420 hydrogenase p=5e-02) in soils from  
354 Pará compared to soils from Rondônia indicates a selection for the hydrogenotrophic pathway.  
355 This selection is supported by the increased availability of trace metals (iron) in soils from Pará  
356 which are needed by methanogenic hydrogenases<sup>58</sup>.

357

### 358 Land-Use Change Alters Key Redox-Cycling Active Taxa

359 In the context of highly complex soil microbial communities, methanogens need other  
360 microorganisms to produce the substrates necessary for this redox reaction to occur.  
361 Methanogenesis is one of the least thermodynamically favorable anaerobic reactions; therefore,  
362 other redox reactions must transpire prior to methanogenesis<sup>69</sup>. Although we were targeting  
363 active methane-cycling microorganisms in this study, the methanogenic substrates used, <sup>13</sup>CO<sub>2</sub>  
364 and <sup>13</sup>NaAOc, are not exclusively used by methanogens. Therefore, we investigated which  
365 coexisting microorganisms were actively consuming these substrates and thereby interacting  
366 with methanogens. Many non-methanogenic but active microbial taxa changed significantly in  
367 abundance between land use types in both geographic locations. In the Pará <sup>13</sup>CO<sub>2</sub> SIP



368 incubations, we observed a significant increase of active *Syntrophus aciditrophicus* ( $p=1E-06$ ) in  
369 pasture along with many known sulfate-reducing bacteria (Supplemental Table 10). *Syntrophus*  
370 *aciditrophicus* is known to promote the growth of *Methanospirillum* spp., which accounted for  
371 2.76% of the active methanogen community in Pará  $^{13}\text{CO}_2$  pasture samples<sup>70</sup>. In the secondary  
372 rainforest, we found a significantly higher abundance of various active nitrifying and sulfur-  
373 oxidizing bacteria, such as *Nitrobacter* and *Thioalkalivibrio*. Many of these microbial groups are  
374 known to utilize  $\text{CO}_2$  and have thermodynamically preferred redox potentials<sup>71-76</sup>. Rondônia  
375 pastures increased in active ammonia-oxidizing microorganisms including *Nitrosococcus* and  
376 *Geobacillus* species ( $^{13}\text{CO}_2$  samples; Supplemental Table 10). One potential cause of increased  
377 *Geobacillus* species is the slash and burn process used to create pastures that deposits  
378 hydrocarbons in the soil, which these microorganisms are known to use<sup>77-79</sup>.

379 The abundance of active *Geobacillus*, *Clostridium*, and *Sulfolobus* spp. increased in Pará  
380  $^{13}\text{NaAOC}$  incubated pasture soils (Supplemental Table 11). Some *Geobacillus* and *Clostridium*  
381 spp. are known to utilize acetate, which may explain their increased abundance in the  $^{13}\text{C}$ -labeled  
382 community<sup>80-81</sup>. The denitrifying bacterium *Hyphomicrobium denitrificans* was active and  
383 significantly increased abundance in Pará primary rainforest samples along with the genes  
384 associated with denitrification ( $p=0.02$ ). In the  $^{13}\text{NaAOC}$  Rondônia soils, we observed a  
385 significant increase in both sulfate-reducing and sulfur-oxidizing microorganisms along with  
386 nitrate-reducers in secondary rainforest with many competitors for acetate as a carbon source<sup>82,74</sup>  
387 (Supplemental Table 11). It is well documented that before methanogenesis is able to occur  
388 nitrate and sulfate must be depleted as electron acceptors<sup>69</sup>. The increased abundance of active  
389 sulfate and nitrate reducers in the Rondônia secondary rainforest and overall lack of active  
390 methanogenesis indicates that these more favorable electron acceptors were still available in the

391 soil during incubation with  $^{13}\text{NaAOc}$  inhibiting methanogenesis through substrate competition<sup>83-</sup>  
392 <sup>84</sup>.

393

#### 394 Soil Physical-Chemical Parameters Increase Potential Methane Production

395 Land-use change is one of the strongest drivers to alter soil ecosystems. Parallel changes  
396 to the soil physical-chemical parameters, physical structure, and aboveground vegetation may  
397 provide additional support for increased methanogenesis in pasture soils. Specifically, the  
398 compaction caused by cattle grazing creates more anoxic microsites providing more opportunity  
399 for methanogenesis to occur<sup>85</sup>. The comparison of soil physical-chemical parameters between the  
400 geographic locations presented several significant differences (Supplemental Tables 12-13). Of  
401 note were increased concentrations of sulfur ( $p=2.95\text{E-}15$ ) and copper ( $p=7.42\text{E-}06$ ) along with  
402 higher pH ( $p=1.35\text{E-}07$ ) in Rondônia compared to Pará, and total soil acidity ( $p=9.29\text{E-}11$ ) and  
403 total nitrogen ( $p=2.31\text{E-}06$ ) were significantly higher in Pará soils. For both locations, the soil  
404 pH was significantly higher in pasture compared to primary rainforests. Soil bulk density was  
405 found to be highest in pasture from both locations (Supplemental Figure 5). The increased pH in  
406 pasture soils likely helps support methanogenesis since optimum process activity is at near  
407 neutral pH and quickly decreases as the pH becomes more acidic<sup>86</sup>. Another contributing factor  
408 to the increased methanogenesis in pasture soils is due to *Urochloa brizantha* excreting large  
409 amounts of carbon as root exudates into the soil<sup>87</sup>. With increased carbon availability in pasture  
410 soils, there is overall increased soil microbial activity<sup>88</sup>. All of these changes to the soil in  
411 pastures could contribute to the increased methanogenic activity observed in our SIP study.

412

413 Relating Functional Activity from In-Field Methane Gas Flux to Functional Potential from  
414 Metagenomics

415 Research into modeling biological activity to help predict future climate scenarios has  
416 continued to grow over the past few decades<sup>89-91</sup>. Since this study focused on the active methane-  
417 cycling microbial community across land use types, we performed a correlation between the  
418 abundance of the active community or of functional biomarkers with the gas fluxes measured in  
419 our sites. Tentatively, we found the strongest correlation between total active methanogen  
420 abundance and field methane flux ( $p=6e-04$ ,  $cor=0.573$ ) (Figure 7). However, these findings will  
421 need to be further investigated across more sampling points to confirm their validity broadly.  
422 Overall, only Rondônia showed significant differences in field methane flux across land-use  
423 types, with pasture having significantly higher methane emissions (PF vs P  $p=1e-04$ , SF vs P  
424  $p=2e-03$ , SF vs PF  $p=9.9e-01$ ; Supplemental Figure 6). The correlation observed between active  
425 methanogen abundance and methane flux in the field provides further support that an increase in  
426 methanogenesis activity is driving the change in methane flux between land-use types.

427

428 Minimal Enrichment of Methane-Cyclers After Incubation

429 In SIP studies specifically, we target the active microbial groups involved in a  
430 biogeochemical process; however, the majority of soil SIP studies use homogenized soil where  
431 soil columns get sieved<sup>92-97</sup>. It is clear from the literature that soil structure is an important aspect  
432 of microbial activity and carbon cycling; therefore, if possible, microbial activity should be  
433 studied under environmentally-relevant conditions. This study shows the feasibility of keeping  
434 soil and its assembled microbial communities more similar to the natural environment by  
435 incubating soil cores in-tact. We observed that even after seven months of incubation, the

436 abundance of functional marker genes (*pmoA* and *mcrA*) did not become greatly enriched.  
437 Compared to field soils at the time of sampling, there was a small but significant increase of  
438 *mcrA* gene copies in Pará <sup>13</sup>CO<sub>2</sub> SIP soil (p=4.6e-03), but no significant difference in soils from  
439 Para amended with <sup>13</sup>NaAOC (p=7.2e-01) (Supplemental Figure 7). Overall, there was no  
440 significant difference between the Rondônia SIP and field soils' *mcrA* gene abundance. The only  
441 significant difference found was between <sup>13</sup>CO<sub>2</sub>-incubated primary forest and pasture samples  
442 (p=4.6e-02). Interestingly, *pmoA* gene abundance decreased significantly in SIP incubated soils  
443 from Pará (p=1E-05) and Rondônia (p=4E-07, Supplemental Figure 8). One possible explanation  
444 for the decreased *pmoA* gene abundance between SIP incubated and field soil is that during the  
445 incubation the methanotrophic community was potentially altered. Our comparative analysis of  
446 the metagenome data supports this possibility as a 7.7-fold and 4.0-fold increase from Rondônia  
447 and Pará, respectively, were observed in obligate methanotroph abundance between <sup>13</sup>C vs <sup>12</sup>C  
448 heavy fraction samples. Since primer bias is a common problem, as previously discussed, the  
449 change in community could alter the compatibility of the primer to the *pmoA* sequences of the  
450 changed community; thus, potentially presenting a lower *pmoA* abundance in the SIP than field  
451 soils.

452

## 453 CONCLUSIONS

454 Land use change from rainforest to pasture stimulates the soil methanogenic community  
455 in the Brazilian Amazon. Using undisturbed soil columns for SIP incubations, we were able to  
456 ascertain that methanogen abundance and activity is significantly higher compared to both  
457 primary and secondary rainforests which could drive methane emissions from the soil of  
458 Brazilian cattle pastures. Future studies should focus on identifying what specific environmental

459 factors are responsible for increased methanogenesis in pasture soils (i.e. pH, vegetation,  
460 compaction, carbon or trace element availability, etc.), so that land management can better  
461 mitigate CH<sub>4</sub> emissions. Another important finding was that secondary rainforests in both  
462 locations have recovered as CH<sub>4</sub> sinks with an active methanotrophic community. Through large  
463 forest restoration efforts occurring in the tropics, there is potential to see these forests recover  
464 with enough time to overcome excess CH<sub>4</sub> production. It is currently unknown how long  
465 secondary rainforests take to recover as a CH<sub>4</sub> sink, and how widespread this recovery is  
466 geographically. Adoption of best management practices in pastures can compensate for a small  
467 fraction of the impact of deforestation on net emission of greenhouse gases and the loss of  
468 carbon from Amazonia. With the currently accelerating expansion of land-use change in  
469 Amazonia understanding which players might assist mitigation of concomitant greenhouse gas  
470 production is increasingly important for all agricultural management.

471

## 472 ACKNOWLEDGEMENTS

473 The authors thank the owners and staff of Agropecuaria Nova Vida for logistical support  
474 and permission to work on their property. We also thank all collaborating private landowners of  
475 Santarem for their support and access to their land. We would like to thank the Large-Scale  
476 Biosphere-Atmosphere Program (LBA), coordinated by the National Institute for Amazon  
477 Researchers (INPA), for the use and availability of data for logistical support and infrastructure  
478 during field activities. We are grateful to Erika Berenguer, Liana Chesini, and Jos Barlow,  
479 members of the EcoFor Project at Lancaster University, UK, for sharing some northern Amazon  
480 sites<sup>98</sup> with us and for logistical support during field activities. Additionally, we are grateful to

481 Alexandre Pedrinho and Wagner Piccinini for assistance with fieldwork and Kiran Khan, Alex  
482 Thompson, Luke Gibney, and Rachel Feldman for assistance processing samples.

483 Funding. This project was supported by the National Science Foundation – Dimensions  
484 of Biodiversity (DEB 1442183), NSF-FAPESP 446 (2014/50320-4), by the Agriculture and  
485 Food Research Initiative Competitive Grant 2009-447 35319-05186 from the US Department of  
486 Agriculture National Institute of Food and Agriculture, and by the U.S. Department of Energy  
487 Joint Genome Institute through the Office of Science of the U.S. Department of Energy under  
488 Contract DE-AC02- 442 05CH11231.

489  
490 ETHICS DECLARATIONS. Conflict of interest. The authors declare that they have no conflict  
491 of interest.

492

#### 493 FIGURE AND TABLE LEGENDS

494 Figure 1. Composition of the total soil microbial community based on 16S rRNA. Non-metric  
495 dimensional scaling plot of rarefied 16S rRNA SILVA annotations at genus-level from all  
496 samples. The dotted lines outline samples from each geographic location (Pará and Rondônia).  
497 The colored lines connect samples from the same land-use type to the centroid (primary  
498 rainforest = green, pasture = orange, and secondary rainforest = blue). The circles represent the  
499 standard error dispersion of samples for each substrate (NaAOc=sodium acetate, CO<sub>2</sub>=carbon  
500 dioxide, CH<sub>4</sub>=methane). The p-values and  $r^2$  values for each variable (Location, Substrate, Land  
501 Use) are derived from the Adonis function in the vegan package.

502 Figure 2. Richness of active methane cycling taxa (methanotroph or methanogen) from two  
503 geographic locations (Pará or Rondônia), three land-use types (primary rainforest = green,

504 pasture = orange, and secondary rainforest = blue) incubated with one of three substrates  
505 (methane, carbon dioxide, and sodium acetate).

506 Figure 3. Abundance of active methanogen genera in the  $^{13}\text{C}$  metagenome samples. (a) The  
507 abundance of active methanogens in soils from Pará incubated with  $^{13}\text{CO}_2$ , (b) the abundance of  
508 active methanogens in soils from Rondônia incubated with  $^{13}\text{CO}_2$ , (c) the abundance of active  
509 methanogens in soils from Pará incubated with  $^{13}\text{NaAOc}$ , (d) the abundance of active  
510 methanogens in soils from Rondônia incubated with  $^{13}\text{NaAOc}$ . Samples on the x-axis are colored  
511 by land use type (primary rainforest (PF) = green, pasture (P) = orange, and secondary rainforest  
512 (SF) = blue).

513 Figure 4. Relative Abundance of methanotroph types I, II, and III across both geographic  
514 locations (Pará and Rondônia) and land use types (primary rainforest, pasture, and secondary  
515 rainforest). Type I = grey, Type II = blue, Type III = pink.

516 Figure 5. Heatmap visualizing the average relative abundance of active genes involved in  
517 methanotrophy pathways. The scale is from lowest relative abundance (blue) to highest relative  
518 abundance (red) of the genes and is normalized to each gene (i.e. column). The metagenome  
519 samples are on the y-axis are colored by land use type (primary rainforest (PF) = green, pasture  
520 (P) = orange, and secondary rainforest (SF) = blue) and have the location (Rondônia or Pará) in  
521 the label. The genes involved in methanotrophy are on the x-axis. The dendrogram shows the  
522 Euclidean distance between samples.

523 Figure 6. Dot chart illustrating the relative abundance of active methanogenesis genes. The  
524 samples are grouped by location in descending order and include both methanogenic substrates  
525 ( $\text{CO}_2$  and NaAOc). The colors correspond to the land use type (green = primary rainforest,

526 orange = pasture, blue = secondary rainforest). The shapes of the dots correspond to substrate  
527 (circle=CO<sub>2</sub>, triangle = NaAOc). Active methanogenesis genes includes SEED subsystem  
528 annotations as “Methanogenesis,” “Methanogenesis from methylated compounds,” and  
529 “Methanogenesis strays,” Methanogenesis strays are “additional genes and clusters from  
530 methanogens”. The specific genes associated with “Methanogenesis strays” can be found by  
531 searching for the subsystem on the SEED viewer  
532 (<http://rast.theseed.org/FIG/seedviewer.cgi?page=SubsystemSelect>).

533 Figure 7. The field gas flux for methane (CH<sub>4</sub> mg-C/m<sup>2</sup>/hr) correlated to active methanogen  
534 abundance in <sup>13</sup>CO<sub>2</sub> and <sup>13</sup>NaAOc SIP incubations. Primary rainforest = green, pasture = red, and  
535 secondary rainforest = blue. Samples from Rondônia are circles and samples from Pará are  
536 triangles.

537 Table 1. Methanogens and methanotrophs that are both active and significantly different between  
538 land use types (primary rainforest, pasture, secondary rainforest). The term ‘Land use  
539 association’ signifies which land use is associated with a significantly higher abundance of the  
540 taxon. Mean relative abundance (%) depicts the average relative percent of each taxon in each  
541 land use.

542

### 543 **Supplemental Table and Figure Legends**

544 Suppl. Figure 1. Visualization of the sampling scheme for each geographic location and land-use  
545 type (two primary rainforests, one cattle pasture, and one secondary rainforest). Soil cores (18 x)  
546 were collected along a transect ranging from 100 to 200 m with five equidistant sampling points.  
547 Three adjacent soil cores were taken from each sampling point with a fourth soil core taken from  
548 sampling points 2, 3, and 4 along the transect.



549

550 Suppl. Figure 2. Non-metric multidimensional scaling indicating how similar the active soil  
551 microbial communities are for the substrates (a)  $^{13}\text{CH}_4$ , (b)  $^{13}\text{CO}_2$ , (c)  $^{13}\text{NaAOc}$  from Pará. The  
552 plot was created using a Bray–Curtis dissimilarity matrix among all samples. Primary rainforest  
553 = green, pasture = red, and secondary rainforest = blue.

554

555 Suppl. Figure 3. Non-metric multidimensional scaling indicating how similar the active soil  
556 microbial communities are for the substrates (a)  $^{13}\text{CH}_4$ , (b)  $^{13}\text{CO}_2$ , (c)  $^{13}\text{NaAOc}$  from Rondônia.  
557 The plot was created using a Bray–Curtis dissimilarity matrix among all samples. Primary  
558 rainforest = green, pasture = red, and secondary rainforest = blue.

559

560 Suppl. Figure 4. Abundance of active methanotroph genera in samples from (a) Pará or (b)  
561 Rondônia incubated with  $^{13}\text{CH}_4$ . The active metagenomes are colored based on land-use type  
562 with primary rainforest = green, pasture = orange, and secondary rainforest = blue.

563

564 Suppl. Figure 5. The soil bulk density ( $\text{g}/\text{cm}^3$ ) for each land use (primary rainforest, pasture,  
565 secondary rainforest) and geographic location (Rondônia and Pará).

566

567 Suppl. Figure 6. The field gas flux for methane ( $\text{CH}_4$   $\text{mg-C}/\text{m}^2/\text{hr}$ ) correlated significantly with  
568 active methanogen abundance in SIP incubations for either substrate  $^{13}\text{CO}_2$  and  $^{13}\text{NaAOc}$ .  
569 Primary rainforest = green, pasture = red, and secondary rainforest = blue. Samples from  
570 Rondônia are circles and samples from Pará are triangles.

571

572 Suppl. Figure 7. The log *mcrA* gene copies per ng of DNA for soils from three land-use types  
573 (primary rainforest, pasture, and secondary rainforest) in Rondônia and Pará incubated with  
574  $^{13}\text{CO}_2$ ,  $^{13}\text{NaAOc}$ , or no incubation (field soil).  $^{13}\text{CO}_2$  samples = red,  $^{13}\text{NaAOc}$  samples = blue,  
575 unaltered samples = green.

576

577 Suppl. Figure 8. The log *pmoA* gene copies per ng of DNA for soil from three land-use types  
578 (primary rainforest, pasture, and secondary rainforest) in Rondônia and Pará incubated with  
579  $^{13}\text{CH}_4$  or no incubation (field soil).

580

581 Suppl. Table 1. Significance values (p-values) from ANOVA with Tukey Honestly Significant  
582 Difference Test comparing the richness of active methane-cycling taxa.

583

584 Suppl. Table 2. The abundance of active methanogen species found in each  $^{13}\text{CO}_2$  SIP incubation  
585 from Rondônia.

586

587 Suppl. Table 3. The abundance of active methanogen species found in each  $^{13}\text{NaAOc}$  SIP  
588 incubation from Rondônia.

589

590 Suppl. Table 4. The abundance of active methanotroph species found in each  $^{13}\text{CH}_4$  SIP  
591 incubation from Rondônia. The Type column specifies whether that methanotroph species is  
592 Type I, II, or III.

593

594 Suppl. Table 5. The abundance of active methanogen species found in each  $^{13}\text{CO}_2$  SIP incubation  
595 from Pará.

596

597 Suppl. Table 6. The abundance of active methanogen species found in each  $^{13}\text{NaAOc}$  SIP  
598 incubation from Pará.

599

600 Suppl. Table 7. The abundance of active methanotroph species found in each  $^{13}\text{CH}_4$  SIP  
601 incubation from Pará. The Type column specifies whether that methanotroph species is Type I,  
602 II, or III.

603

604 Suppl. Table 8. The relative abundance of active methanotrophy or methanotrophy-related genes  
605 for samples incubated with  $^{13}\text{CH}_4$ . Location indicates whether the sample is from Rondônia or  
606 Pará. Land use states whether the sample is from a primary rainforest, pasture, or secondary  
607 rainforest. The within and between location values show the p-value from a two-tailed t-test  
608 comparing land-use types.

609

610 Suppl. Table 9. The relative abundance (%) of active methanogenesis genes (methanogenesis +  
611 methanogenesis strays + methanogenesis from methylated compounds) to the total  
612 methanogenesis gene annotations for each sample incubated with either  $^{13}\text{CO}_2$  or  $^{13}\text{NaAOc}$ .  
613 Location indicates whether the sample is from Rondônia or Pará. Land use states whether the  
614 sample is from a primary rainforest, pasture, or secondary rainforest. SIP Incubation indicates  
615 whether the sample was incubated with  $^{13}\text{CO}_2$  or  $^{13}\text{NaAOc}$ . PF = primary rainforest, P =  
616 pasture, SF = secondary rainforest. Methanogenesis strays are described by SEED Subsystem as

617 “additional genes and clusters from methanogens”. The specific genes associated with these  
618 SEED Subsystems can be found by searching for the subsystem on the SEED Viewer  
619 (<http://rast.theseed.org/FIG/seedviewer.cgi?page=SubsystemSelect>). The two-tailed t-test values  
620 are p-values with significant ( $p < 0.05$ ) highlighted in red.

621  
622 Suppl. Table 10. Microbial species implicated in the sulfur, nitrogen, or carbon cycle that were  
623 active and significantly different between land use types in Rondônia or Pará  $^{13}\text{CO}_2$ -supported  
624 SIP samples. The term “Land use association” indicates the land use type that had (1) a  
625 significantly higher abundance than the other land use types, and (2) the microbial species was  
626 active in that land use type.

627  
628 Suppl. Table 11. Microbial species implicated in the sulfur, nitrogen, or carbon cycle that were  
629 active and significantly different between land use types in Rondônia or Pará  $^{13}\text{NaAOC}$ -  
630 supported SIP samples. The term “Land use association” indicates the land use type that had (1)  
631 a significantly higher abundance than the other land use types, and (2) the microbial species was  
632 active in that land use type.

633  
634 Suppl. Table 12. Soil physico-chemical properties of samples collected in pasture, primary  
635 rainforest, and secondary rainforest in the State of Pará, Brazil . The mean values and results  
636 from an ANOVA with a post-hoc Tukey-Kramer test are tabulated. M.O. = organic matter. H+Al  
637 = total soil acidity, SB = sum of exchangeable bases (Ca + Mg + K), CTC = cation exchange  
638 capacity, m = aluminum saturation. mmolc = millimoles of charge, V = base saturation as a  
639 percentage of CTC, m = aluminum saturation as a percentage of CTC.

640

641 Suppl. Table 13. Soil physico-chemical properties of samples collected in pasture, primary  
642 rainforest, and secondary rainforest in the State of Rondônia, Brazil. The mean values and results  
643 from an ANOVA with a post-hoc Tukey-Kramer test are tabulated. M.O. = organic matter, H+Al  
644 = total soil acidity, SB = sum of exchangeable bases (Ca + Mg + K), CTC = cation exchange  
645 capacity. m = aluminum saturation, mmolc = millimoles of charge, V = base saturation as a  
646 percentage of CTC, m = aluminum saturation as a percentage of CTC.

647

648

649

650 REFERENCES

- 651 1. IPCC, 2013: *Climate Change 2013: The Physical Science Basis. Contribution of Working*  
652 *Group I to the Fifth Assessment Report of the Intergovernmental Panel on Climate*  
653 *Change*. [Stocker, T.F., D. Qin, G.-K. Plattner, M. Tignor, S.K. Allen, J. Boschung, A.  
654 Nauels, Y.Xia, V. Bex and P.M. Midgley (eds.)]. Cambridge University Press,  
655 Cambridge, United Kingdom and New York, USA, 1535 pp.
- 656
- 657 2. De Azevedo, T.R., Junior, C.C., Junior, A.B., dos Santos Cremer, M., Piatto, M., Tsai,  
658 D.S., ... & Rodrigues, A. (2018). SEEG initiative estimates of Brazilian greenhouse gas  
659 emissions from 1970 to 2015. *Scientific data*, 5, 180045.
- 660
- 661 3. West, T.A.P., Börner, J., and Fearnside, P.M. (2019). “Climatic benefits from the 2006-  
662 2017 avoided deforestation in Amazonian Brazil.” *Frontiers in Forests and Global*  
663 *Change*. 2:52.
- 664
- 665 4. Malhi, Y., Roberts, J.T., Betts, R.A., Killeen, T.J., Li, W., and Nobre, C.A. (2008).  
666 “Climate Change, Deforestation, and the Fate of the Amazon.” *Science*. 319:169-173.
- 667
- 668 5. Curtis, P.G., Slay, C.M., Harris, N.L. Tyukavina, A., and Hansen, M.C. (2018).  
669 “Classifying drivers of global forest loss.” *Science*. 361(6407):1108-1111.
- 670

- 671 6. Paula, F.S., Rodrigues, J.L.M., Zhou, J., Wu, L., Mueller, R.C., Mirza, B.S., *et al.* (2014).  
672 “Land use change alters functional gene diversity, composition and abundance in  
673 Amazon forest soil microbial communities.” *Molecular Ecology*. doi:10.1111/mec.12786  
674
- 675 7. Evans, P.N., Boyd, J.A., Leu, A.O., Woodcroft, B.J., Parks, D.H., Hugenholtz, P., and  
676 Tyson G.W. (2019). “An evolving view of methane metabolism in the Archaea.” *Nature*  
677 *Reviews Microbiology*. 17:219-232.  
678
- 679 8. Serrano-Silva, N., Sarria-Guzmán, Y., Dendooven, L., and Luna-Guido, M. (2014).  
680 “Methanogenesis and Methanotrophy in Soil: A Review.” *Pedosphere*. 24(3):291-307.  
681
- 682 9. Zinder, S.H. (1993). “Physiological ecology of methanogens.” In Ferry, J.G. (Ed).  
683 *Methanogenesis: Ecology, Physiology, Biochemistry and Genetics*. Chapman & Hall,  
684 New York, NY, USA. pp 128-206.  
685
- 686 10. Schink, B., and Stams, A.J.M. (2013). “Syntrophism among prokaryotes.” In Rosenberg,  
687 E., DeLong, F., Lory, S., Stackebrandt, E., & Thompson, F. (Eds). *The Prokaryotes:*  
688 *Prokaryotic Communities and Ecophysiology*. Springer, Berlin. pp 471-493.  
689
- 690 11. Costa, K.C., and Leigh, J.A. (2014). “Metabolic versatility in methanogens.” *Current*  
691 *Opinion in Biotechnology*. 29:70-75.  
692

- 693 12. Semrau, J.D., DiSpirito, A.A., and Yoon, S. (2010). “Methanotrophs and copper.” *FEMS*  
694 *Microbiology Reviews*. 34(4):496-531.  
695
- 696 13. van Teeseling, M.C.F., Pol, A., Harhangi, H.R., van der Zwart, S., Jetten, M.S.M., Op  
697 den Camp, H.J.M., *et al.* (2014). “Expanding the Verrucomicrobial Methanotrophic  
698 World: Description of Three Novel Species of *Methylacidimicrobium* gen. nov.” *Applied*  
699 *and Environmental Microbiology*. 80(21):6782-6792.  
700
- 701 14. Murrell, J.C., and Dalton, H. (1983). “Nitrogen Fixation in Obligate Methanotrophs.”  
702 *Journal of General Microbiology*. 129:3481-3486.  
703
- 704 15. Graham, D.W., Chaudhary, J.A., Hanson, R.S., and Arnold, R.G. (1993). “Factors  
705 Affecting Competition Between Type I and Type II Methanotrophs in Two-organism,  
706 Continuous-flow Reactors.” *Microbial Ecology*. 25:1-17.  
707
- 708 16. Amaral, J.A., and Knowles, R. (1995). “Growth of methanotrophs in methane and  
709 oxygen counter gradients.” *FEMS Microbiology Letters*. 126:215-220.  
710
- 711 17. Dunfield, P.F., Liesack, W., Henckel, T., Knowles, R., and Conrad, R. (1999). “High-  
712 Affinity Methane Oxidation by a Soil Enrichment Culture Containing a Type II  
713 Methanotroph.” *Applied and Environmental Microbiology*. 65(3):1009-1014.  
714



- 715 18. Bull, I.D., Parekh, N.R., Hall, G.H., Ineson, P, and Evershed, R.P. (2000). “Detection and  
716 classification of atmospheric methane oxidizing bacteria in soil.” *Nature*. 405:175-178.  
717
- 718 19. Meyer KM, Klein AM, Rodrigues JLM, Nüsslein K, Tringe SG, Mirza BS, *et al.* (2017).  
719 “Conversion of Amazon Rainforest to Agriculture Alters Community Traits of Methane-  
720 Cycling Organisms.” *Molecular Ecology*. 26(6):1547-1556.  
721
- 722 20. Baani, M., and Liesack, W. (2008). “Two isoenzymes of particulate methane  
723 monooxygenase with different methane oxidation kinetics are found in *Methylocystis* sp.  
724 strain SC2.” *Proc Natl Acad Sci*. 105(29):10203-8.  
725
- 726 21. Keller, M., Goreau, T.J., Wofsy, S.C., Kaplan, W.A., and McElroy, M.B. (1986).  
727 “Production of nitrous oxide and consumption of methane by forest soils.” *Geophysical*  
728 *Research Letters*. 10(12):1156-1159.  
729
- 730 22. Steudler, P.A., Melillo, J.M., Feigl, B.J., Neill, C., Piccolo, M.C., and Cerri, C.C. (1996).  
731 “Consequence of forest-to-pasture conversion on CH<sub>4</sub> fluxes in the Brazilian Amazon  
732 Basin.” *Journal of Geophysical Research: Atmospheres*. 101(D13):18547-18554.  
733
- 734 23. Fearnside, P.M. (1997). “Greenhouse gases from deforestation in Brazilian Amazonia:  
735 net committed emissions.” *Climatic Change*. 35(3):321-360.  
736

- 737 24. Fernandes, S.A.P., Bernoux, M., Cerri, C.C., Feigl, B.J., and Piccolo, M.C. (2002).  
738 “Seasonal variation of soil chemical properties and CO<sub>2</sub> and CH<sub>4</sub> fluxes in unfertilized  
739 and P-fertilized pastures in an Ultisol of the Brazilian Amazon.” *Geoderma*. 107:227-  
740 241.
- 741
- 742 25. Wick, B., Veldkamp, E., de Mello, W. Z., Keller, M. and Crill, P. (2005). “Nitrous oxide  
743 fluxes and nitrogen cycling along a pasture chronosequence in Central Amazonia,  
744 Brazil.” *Biogeosciences*. 2: 175-187.
- 745
- 746 26. Tveit, A.T., Urich, T., and Svenning, M.M. (2014). “Metatranscriptomic Analysis of  
747 Active Peat Soil Microbiome.” *Appl. Environ. Microbiol.* 80(18):5761-5772.
- 748
- 749 27. Singer, E., Wagner, M., and Woyke, T. (2017). “Capturing the genetic makeup of the  
750 active microbiome *in situ*.” *ISME J.* 11:1949-1963.
- 751
- 752 28. Keiblinger, K.M., Wilhartitz, I.C., Schneider, T., Roschitzki, B., Schmid, E., Eberl, L.,  
753 Riedel, K., and Zechmeister-Boltenstern, S. (2012). “Soil metaproteomics – Comparative  
754 evaluation of protein extraction protocols.” *Soil Biol. Biochem.* 54:14-24.
- 755
- 756 29. Kroeger, M.E., and Nüsslein, K. (2019). “Stable Isotope Probing – Detection of Active  
757 Microbes in Soil.” *Modern Soil Microbiology, Third Edition*. Ed. Jan Dirk Van Elsas.  
758 Boca Raton: CRC Press.
- 759

- 760 30. Esson, K., Lin, X., Kumaresan, D., Chanton, J.P., Murrell, J.C., and Kostka, J.E. (2016).  
761 “Alpha- and Gammaproteobacterial Methanotrophs Codominate the Active Methane-  
762 Oxidizing Communities in an Acidic Boreal Peat Bog.” *Appl. Environ. Microbiol.* 82(8):  
763 2363-2371.
- 764
- 765 31. Dumont, M.G., Radajewski, S.M., Miguez, C.B., McDonald, I.R., and Murrell, J.C.  
766 (2006). “Identification of a complete methane monooxygenase operon from soil by  
767 combining stable isotope probing and metagenomic analysis.” *Environ. Microbiol.*  
768 8:1240-1250.
- 769
- 770 32. Lu, Y., Leuders, T., Friedrich, M.W., and Conrad, R. (2005). “Detecting active  
771 methanogenic populations on rice roots using stable isotope probing.” *Environ.*  
772 *Microbiol.* 7(3): 326-336.
- 773
- 774 33. Neufeld, J.D., Vohra, J., Dumont, M.G., Lueders, T., Manefield, M., Friedrich, M.W. and  
775 J.C. Murrell. (2007). “DNA stable-isotope probing.” *Nature Protocols.* 2: 860–866.
- 776
- 777 34. Holmes, A.J., Costello, A., Lidstrom, M.E., and Murrell, J.C. (1995). “Evidence that  
778 particulate methane monooxygenase and ammonia monooxygenase may be  
779 evolutionarily related.” *FEMS Microbiol. Letters.* 132:203-208.
- 780

- 781 35. Costello, A. and Lidstrom, M.E. (1999). “Molecular Characterization of Functional and  
782 Phylogenetic Genes from Natural Populations of Methanotrophs in Lake Sediments.”  
783 *Appl. Environ. Microbiol.* 65(11):5066-5074.  
784
- 785 36. Steinberg, L.M. and Regan, J.M. (2008). “Phylogenetic comparison of the methanogenic  
786 communities from an acidic, oligotrophic fen and an anaerobic digester treating  
787 municipal wastewater sludge.” *Appl. Environ. Microbiol.* 74(21):6663-6671.  
788
- 789 37. Navarrete AA, Tsai SM, Mendes LW, Faust K, de Hollander M, Cassman NA, *et al.*  
790 (2015). “Soil microbiome responses to the short-term effects of Amazonian  
791 deforestation.” *Molecular Ecology.* 24(10):2433-2448.  
792
- 793 38. Pirk, N., Mastepanov, M., Parmentier, F.-J., Lund, M., Crill, P., and Christensen, T.R.  
794 (2016). “Calculations of automatic chamber flux measurements of methane and carbon  
795 dioxide using short time series of concentrations.” *Biogeosciences* 13, 903-912.  
796
- 797 39. Salimon, C.I., Davidson, E.A., Victoria, R.L., and Melo, A.W.F. (2004). “CO<sub>2</sub> flux from  
798 soil in pastures and forests in southwestern Amazonia.” *Global Change Biology* 10, 833-  
799 843.  
800
- 801 40. Callahan, B.J., McMurdie, P.J., Rosen, M.J., Han, A.W., Johnson, A.J.A., and Holmes,  
802 S.P. (2016). “DADA2: High resolution sample inference from Illumina amplicon data.”  
803 *Nat. Methods.* 13(7):581-583.

804

805 41. Bokulich, N.A., Kaehler, B.D., Rideout, J.R., Dillon, M., Bolyen, E., Knight, R., Huttley,  
806 G.A., and Caporaso Jr., G. (2018). “Optimizing taxonomic classification of marker-gene  
807 amplicon sequences with QIIME 2’s q2-feature-classifier plugin.” *Microbiome*. 6(1):90.

808

809 42. Keegan, K.P., Glass, E.M., and Meyer, F. (2016). “MG-RAST, a Metagenomics Service  
810 for Analysis of Microbial Community Structure and Function.” *Methods Mol Biol*.  
811 1399:207-233.

812

813 43. R Core Team. (2018). R: A language and environment for statistical computing R  
814 Foundation for Statistical Computing Vienna Austria. URL <https://wwwR-project.org/>

815

816 44. Oksanen JF, Blanchet G, Friendly M, Kindt R, Legendre P, McGlenn D, et al. (2018).  
817 *vegan: Community Ecology Package*. R package version 2.4-6. [https://CRAN.R-](https://CRAN.R-project.org/package=vegan)  
818 [project.org/package=vegan](https://CRAN.R-project.org/package=vegan)

819

820 45. Parks, D.H., Tyson, G.W., Hugenholtz, P., and Beiko, R.G. (2014). “STAMP: Statistical  
821 analysis of taxonomic and functional profiles.” *Bioinformatics*. 30(21):3123-3124.

822

823 46. Wickham, H. *ggplot2: Elegant Graphics for Data Analysis*. Springer-Verlag New York,  
824 2016.

825

- 826 47. Pinto, A.J. and Raskin, L. (2012). “PCR biases distort bacterial and archaeal community  
827 structure in pyrosequencing datasets.” *PLoS One*. 7(8):e43093.  
828
- 829 48. Huse, S.M., Welch, D.M., Morrison, H.G., and Sogin, M.L. (2010). “Ironing out the  
830 wrinkles in the rare biosphere through improved OTU clustering.” *Environ. Microbiol.*  
831 12(7):1889-1898.  
832
- 833 49. Quince, C., Walker, A.W., Simpson, J.T., Loman, N.J., and Segata, N. (2017). “Shotgun  
834 metagenomics, from sampling to sequencing and analysis.” *Nature Biotechnology*.  
835 35:833-844.  
836
- 837 50. Coyotzi, S., Pratscher, J., Murrell, J.C., and Neufeld, J.D. (2016). “Targeted  
838 metagenomics of active microbial populations with stable-isotope probing.” *Curr. Opin.*  
839 *Biotechnol.* 41:1-8.  
840
- 841 51. Eyice, Ö., Namura, M., Chen, Y., Mead, A., Samavedam, S. and H. Schäfer. (2015). “SIP  
842 metagenomics identifies uncultivated Methylophilaceae as dimethylsulphide degrading  
843 bacteria in soil and lake sediment.” *International Society of Microbial Ecology*  
844 *Journal*. 9: 2336.  
845
- 846 52. Cardoso, D., Sarkinen, T., Alexander, S., Amorim, A.M., Bittrich, V., Celis, M., *et al.*  
847 (2017). “Amazon plant diversity revealed by a taxonomically verified species list.”  
848 *Proceedings of the National Academy of Sciences*. 114(40):10695-10700.

849

850 53. Sgouridis, F. and Ullah, S. (2017). “Soil Greenhouse Gas Fluxes, Environmental  
851 Controls, and the Partitioning of N<sub>2</sub>O Sources in UK Natural and Seminatural Land Use  
852 Types.” *Journal of Geophysical Research: Biogeosciences*. 10.1002/2017JG003783.

853

854 54. Wanyama, I., Pelster, D.E., Butterbach-Bahl, K., Verchot, L.V., Martius, C., and Rufino,  
855 M.C. (2019). “Soil carbon dioxide and methane fluxes from forests and other land use  
856 types in an African tropical montane region.” *Biogeochemistry*. 143:171-190.

857

858 55. Lackner, N., Hintersonleitner, A., Wagner, A.O., and Illmer, P. (2018).  
859 “Hydrogenotrophic Methanogenesis and Autotrophic Growth of *Methanosarcina*  
860 *thermophila*.” *Archaea*. Vol 2018. Article ID 4712608.

861

862 56. Ferry, J.G. (2011). “Fundamentals of methanogenic pathways that are key to the  
863 biomethanation of complex biomass.” *Curr Opin Biotechnol*. 22(3):351-357.

864

865 57. Welander, P.V. and Metcalf, W.W. (2005). “Loss of the mtr operon in *Methanosarcina*  
866 blocks growth on methanol, but not methanogenesis, and reveals an unknown  
867 methanogenic pathway.” *Proc Natl Acad Sci*. 102(30):10664-10669.

868

869 58. Mand, T.D., and Metcalf, W.W. (2019). Energy Conservation and Hydrogenase Function  
870 in Methanogenic Archaea, in Particular the Genus *Methanosarcina*. *Microbiol. Molec.*  
871 *Biol. Reviews*, 83(4), e00020-19.

872

873 59. Lammel DR, Feigl BJ, Cerri CC, Nusslein K. (2015). “Specific microbial gene  
874 abundances and soil parameters contribute to C, N, and greenhouse gas process rates after  
875 land use change in Southern Amazonian Soils.” *Frontiers in Microbiology*. 6:1057.

876

877 60. Kroeger, M.E., Delmont, T.O., Meyer, K.M., Guo, J., Khan, K., Rodrigues, J.L.M., *et al.*  
878 (2018). “New Biological Insights Into How Deforestation in Amazonia Affects Soil  
879 Microbial Communities Using Metagenomics and Metagenome-Assembled Genomes.”  
880 *Frontiers in Microbiology*. 9:1635.

881

882 61. Pedrinho, A., Mendes, L.W., Merloti, L.F., de Cassia da Fonseca, M., de Souza  
883 Cannavan, F., Tsai, S.M. (2019). “Forest-to-pasture conversion and recovery based on  
884 assessment of microbial communities in Eastern Amazon rainforest.” *FEMS Microbiol.*  
885 *Ecol.* 95(3):fy236.

886

887 62. Carini, P., Marsden, P.J., Leff, J.W., Morgan, E.E., Strickland, M.S., and Fierer, N.  
888 (2017). “Relic DNA is abundant in soil and obscures estimates of soil microbial  
889 diversity.” *Nat Microbiol* 2: 16242.

890

891 63. Lennon, J.T., Muscarella, M.E., Placella, S.A. and Lehmkuhl, B.K. (2018). “How, when,  
892 and where relic DNA affects microbial diversity.” *MBio*, 9:e00637-18.

893



- 894 64. Sirois, S.H. and Buckley, D.H. (2019). “Factors governing extracellular DNA  
895 degradation dynamics in soil.” *Environ. Microbiol. Reports* 11:173-184.  
896
- 897 65. Mancinelli, R.L. (1995). “The Regulation of Methane Oxidation in Soil.” *Annu. Rev.*  
898 *Microbiol.* 49:581-605.  
899
- 900 66. Guggenheim, C., Brand, A., Bürgmann, H., Sigg, L., and Wehrli, B. (2019). “Aerobic  
901 methane oxidation under copper scarcity in a stratified lake.” *Sci. Reports.* 9:4817.  
902
- 903 67. Knapp, C.W., Fowle, D.A., Kulczycki, E., Roberts, J.A., and Graham, D.W. (2007).  
904 “Methane monooxygenase gene expression mediated by methanobactin in the presence of  
905 mineral copper sources.”  
906
- 907 68. Rodrigues, J.L.M., Pellizari, V.H., Mueller, R., Baek, K., da C Jesus, E., Paula, F.S., *et*  
908 *al.* (2013). “Conversion of the Amazon rainforest to agriculture results in biotic  
909 homogenization of soil bacterial communities.” *Proceedings of the National Academy of*  
910 *Sciences.* 110(3):988-993.  
911
- 912 69. Hoehler, T., Losey, N.A., Gupsalus, R.P., and McInerney, M.J. (2018). Environmental  
913 constraints that limit methanogenesis. In Stams and Sousa (Eds), *Biogenesis of*  
914 *Hydrocarbons.* Berlin Heidelberg, Springer-Verlag (pp. 1-26).  
915

- 916 70. Elshahed, M.S., Bhupathiraju, V.K., Wofford, N.Q., Nanny, M.A., and McInerney, M.J.  
917 (2001). “Metabolism of Benzoate, Cyclohex-1-ene Carboxylate, and Cyclohexane  
918 Carboxylate by “*Syntrophus aciditrophicus*” Strain SB in Syntrophic Association with  
919 H<sub>2</sub>-Using Microorganisms.” *Appl. Environ. Microbiol.* 67(4):1728-1738.  
920
- 921 71. Zehnder, A.J.B. and Stumm, W. (1988). Geochemistry and biogeochemistry of anaerobic  
922 habitats. In A.J.B. Zehnder (Ed.), *Biology of anaerobic microorganisms* (pp.1-38).  
923
- 924 72. Wolfe R.S. (1991). My kind of biology. *Annu. Rev. Microbiol.* 45:1–35.  
925
- 926 73. Strittmatter, A.W., Liesegang, H., Rabus, R., Decker, I., Amann, J., Andres, S., Henne,  
927 A., Fricke, W.F., Martinez-Arias, R., Barteis, D., Goesmann, A., Krause, L., Pühler, A.,  
928 Klenk, H-P., Richter, M., Schüler, M., Glöckner, F.O., Meyerdierks, A., Gottschalk, G.,  
929 and Amann, R. (2009). “Genome sequence of *Desulfobacterium autotrophicum* HRM2, a  
930 marine sulfate reducer oxidizing organic carbon completely to carbon dioxide.” *Environ.*  
931 *Microbiol.* 11(5):1038-1055.  
932
- 933 74. Badziong, W., Ditter, B., and Thauer, R.K. (1979). “Acetate and carbon dioxide  
934 assimilation by *Desulfovibrio vulgaris* (Marburg), growing on hydrogen and sulfate as  
935 sole energy source.” *Arch. Microbiol.* 123(3):301-305.  
936

- 937 75. Watson, S.W. and Waterbury, J.B. (1971). "Characteristics of two marine nitrite  
938 oxidizing bacteria, *Nitrospina gracilis* nov. gen. nov. sp. and *Nitrococcus mobilis* nov.  
939 gen. nov. sp." *Arch. Microbiol.* 77(3):203-230.
- 940
- 941 76. Sorokin, D.Y., Tourova, T.P., Lysenko, A.M., Mityushina, L.L., and Kuenen, J.G.  
942 (2002). "Thioalkalivibrio thiocyanoxidans sp. nov. and Thioalkalivibrio paradoxus sp.  
943 nov., novel alkaliphilic, obligately autotrophic, sulfur-oxidizing bacteria capable growth  
944 on thiocyanate, from soda lakes." *IJSEM.* 52:657-664.
- 945
- 946 77. Kukla, J., Whitfeld, T., Cajthaml, T., Baldrian, P., Veselá-Šimáčková, H., Novotný, V.,  
947 and Frouz J. (2018). "The effect of traditional slash-and-burn agriculture on soil organic  
948 matter, nutrient content, and microbiota in tropical ecosystems of Papua New Guinea."  
949 *Land Degrad. Dev.* 30:166-177.
- 950
- 951 78. Banat, I.M. and Marchant, R. (2011). *Geobacillus* Activities in Soil and Oil  
952 Contamination Remediation. In Logan, N.A. and De Vos, P. (Eds). *Endospore-forming*  
953 *Soil Bacteria*, *Soil Biology* 27, Springer-Verlag Berlin Heidelberg. pp. 259-270.
- 954
- 955 79. Durrer, A., Margenot, A.J., Silva, L.C.R., Bohannan, B.J.M., Nüsslein, K., van Haren, J.,  
956 Andreote, F.D., Parikh, S.J., and Rodrigues, J.L.M. (*in review*). "Beyond total carbon:  
957 long-term effect of deforestation on Amazonian soils."  
958

- 959 80. Nazina, T.N., Tourova, T.P., Poltaraus, A.B., Novikova, E.V., Grigoryan, A.A., Ivanova,  
960 A.E., Lysenko, A.M., Petrunyaka, V.V., Osipov, G.A., Belyaev, S.S., and Ivanov, M.V.  
961 (2001). "Taxonomic study of aerobic thermophilic bacilli: descriptions of *Geobacillus*  
962 *subterraneus* gen. nov., sp. nov. and *Geobacillus uzenensis* sp. nov. from petroleum  
963 reservoirs and transfer of *Bacillus thermoleovorans*, *Bacillus kaustophilus*, *Bacillus*  
964 *thermodenitrificans* to *Geobacillus* as the new combinations *G. stearotherophilus*,  
965 *G.th.*" *IJSEM*. 51(Pt.2):433-446.
- 966
- 967 81. Schnürer, A., Schink, B., and Svensson, B.H. (1996). "Clostridium ultunense sp. nov., a  
968 mesophilic bacterium oxidizing acetate in syntrophic association with a hydrogenotrophic  
969 methanogenic bacterium." *IJSEM*. 46(4):1145-1152.
- 970
- 971 82. Myhr, S. and Torsvik, T. (2000). "Denitrovibrio acetiphilus, a novel genus and species of  
972 dissimilatory nitrate-reducing bacterium isolated from an oil reservoir model column."  
973 *IJSEM*. 50:1611-1619.
- 974
- 975 83. Yao, H., Conrad, R., Wassmann, R., and Neue, H.U. (1999). "Effect of soil  
976 characteristics on sequential reduction and methane production in sixteen rice paddy soils  
977 from China, the Philippines, and Italy." *Biogeochemistry*. 47:269-295.
- 978
- 979 84. Achtnich, C., Bak, F., and Conrad, R. (1995). "Competition for electron donors among  
980 nitrate reducers, ferric iron reducers, sulfate reducers, and methanogens in anoxic paddy  
981 soil." *Biol. Fertil. Soils*. 19:65-72.

982

983 85. Verchot, L.V., Davidson, E.A., Cattânio, J.H., and Ackerman, I.L. (2000). “Land-Use  
984 Change and Biogeochemical Controls of Methane Fluxes in Soils of Eastern Amazonia.”  
985 *Ecosystems*. 3:41-56.

986

987 86. Wagner, R., Zona, D., Oechel, W., and Lipson, D. (2017). “Microbial community  
988 structure and soil pH correspond to methane production in Arctic Alaska soils.”  
989 *Environmental Microbiology*. 19:3398-3410.

990

991 87. Feigl, B.J., Melillo, J., and Cerri, C.C. (1995). “Changes in the origin and quality of soil  
992 organic matter after pasture introduction in R ndonia (Brazil).” *Plant and Soil*. 175:21-  
993 29.

994

995 88. Salimon, C.I., Davidson, E.A., Victoria, R.L., and Melo, A.W.F. (2004). “CO<sub>2</sub> flux from  
996 soil in pastures and forests in southwestern Amazonia.” *Glob. Change Biol.*10:833-843.

997

998 89. Zhou, J., Xue, K., Xie, J., Deng, Y., Wu, L., Cheng, X., Fei, S., Deng, S., He, Z., Van  
999 Nostrand, J.D., and Luo, Y. (2011). “Microbial mediation of carbon-cycle feedbacks to  
1000 climate warming.” *Nat. Climate Change*. 2:106-110.

1001

1002 90. Hotaling, S., Hood, E., and Hamilton, T. L. (2017). “Microbial ecology of mountain  
1003 glacier ecosystems: biodiversity, ecological connections and implications of a warming  
1004 climate.” *Environ. Microbiol.* 19(8):2935-2948.

- 1005
- 1006 91. Trevedi, P., Anderson, I.C., and Singh, B.K. (2013). “Microbial modulators of soil  
1007 carbon storage: integrating genomic and metabolic knowledge for global prediction.”  
1008 *Trends in Microbiology*. 21(12):641-651.
- 1009
- 1010 92. Wilhelm, R.C., Singh, R., Eltis, L.D. and Mohn, W.W. (2019). “Bacterial contributions to  
1011 delignification and lignocellulose degradation in forest soils with metagenomic and  
1012 quantitative stable isotope probing.” *ISME J*. 13:413-418.
- 1013
- 1014 93. Pepe-Ranney C, Campbell AN, Koechli CN, Berthrong S, Buckley DH. (2016).  
1015 “Unearthing the Ecology of Soil Microorganisms Using a High-Resolution DNA-SIP  
1016 Approach to Explore Cellulose and Xylose Metabolism in Soil.” *Frontiers in*  
1017 *Microbiology*. 7: 703.
- 1018
- 1019 94. Murase, J., Hordijk, K., Tayasu, I, and Bodelier, P.L.E. (2011). “Strain-specific  
1020 incorporation of methanotrophic biomass into eukaryotic grazers in a rice field soil  
1021 revealed by PLFA-SIP.” *FEMS Microbiol. Ecol*. 75:284-290.
- 1022
- 1023 95. Radajewski, S., Ineson, P., Parekh, N.R., and Murrell, J.C. (2000). “Stable-isotope  
1024 probing as a tool in microbial ecology.” *Nature*. 403:646-649.
- 1025

- 1026 96. Cébron, A., Bodrossy, L., Chen, Y., Singer, A.C., Thompson, I.P., Prosser, J.I. *et al.*  
1027 (2007). “Identity of active methanotrophs in landfill cover soil as revealed by DNA-  
1028 stable isotope probing.” *FEMS Microbiology Ecology*. 62: 12-23.
- 1029
- 1030 97. Lee, C.G., Watanabe, T. and S. Asakawa. (2017). “Bacterial community incorporating  
1031 carbon derived from plant residue in an anoxic non-rhizosphere soil estimated by DNA-  
1032 SIP analysis.” *Journal of Soils and Sediments*. 17: 1084-1091.
- 1033
- 1034 98. Berenguer, E., Gardner, T.A., Ferreira, J., Aragao, L.E., Camargo, P.B., Cerri, C.E.,  
1035 Durigan, M., Junior, R.C.O., Vieira, I.C., Barlow, J. (2015). “Developing cost-effective  
1036 field assessments of carbon stocks in human-modified tropical forests.” *PloS one*, 10(8):  
1037 [e0133139](#).
- 1038
- 1039

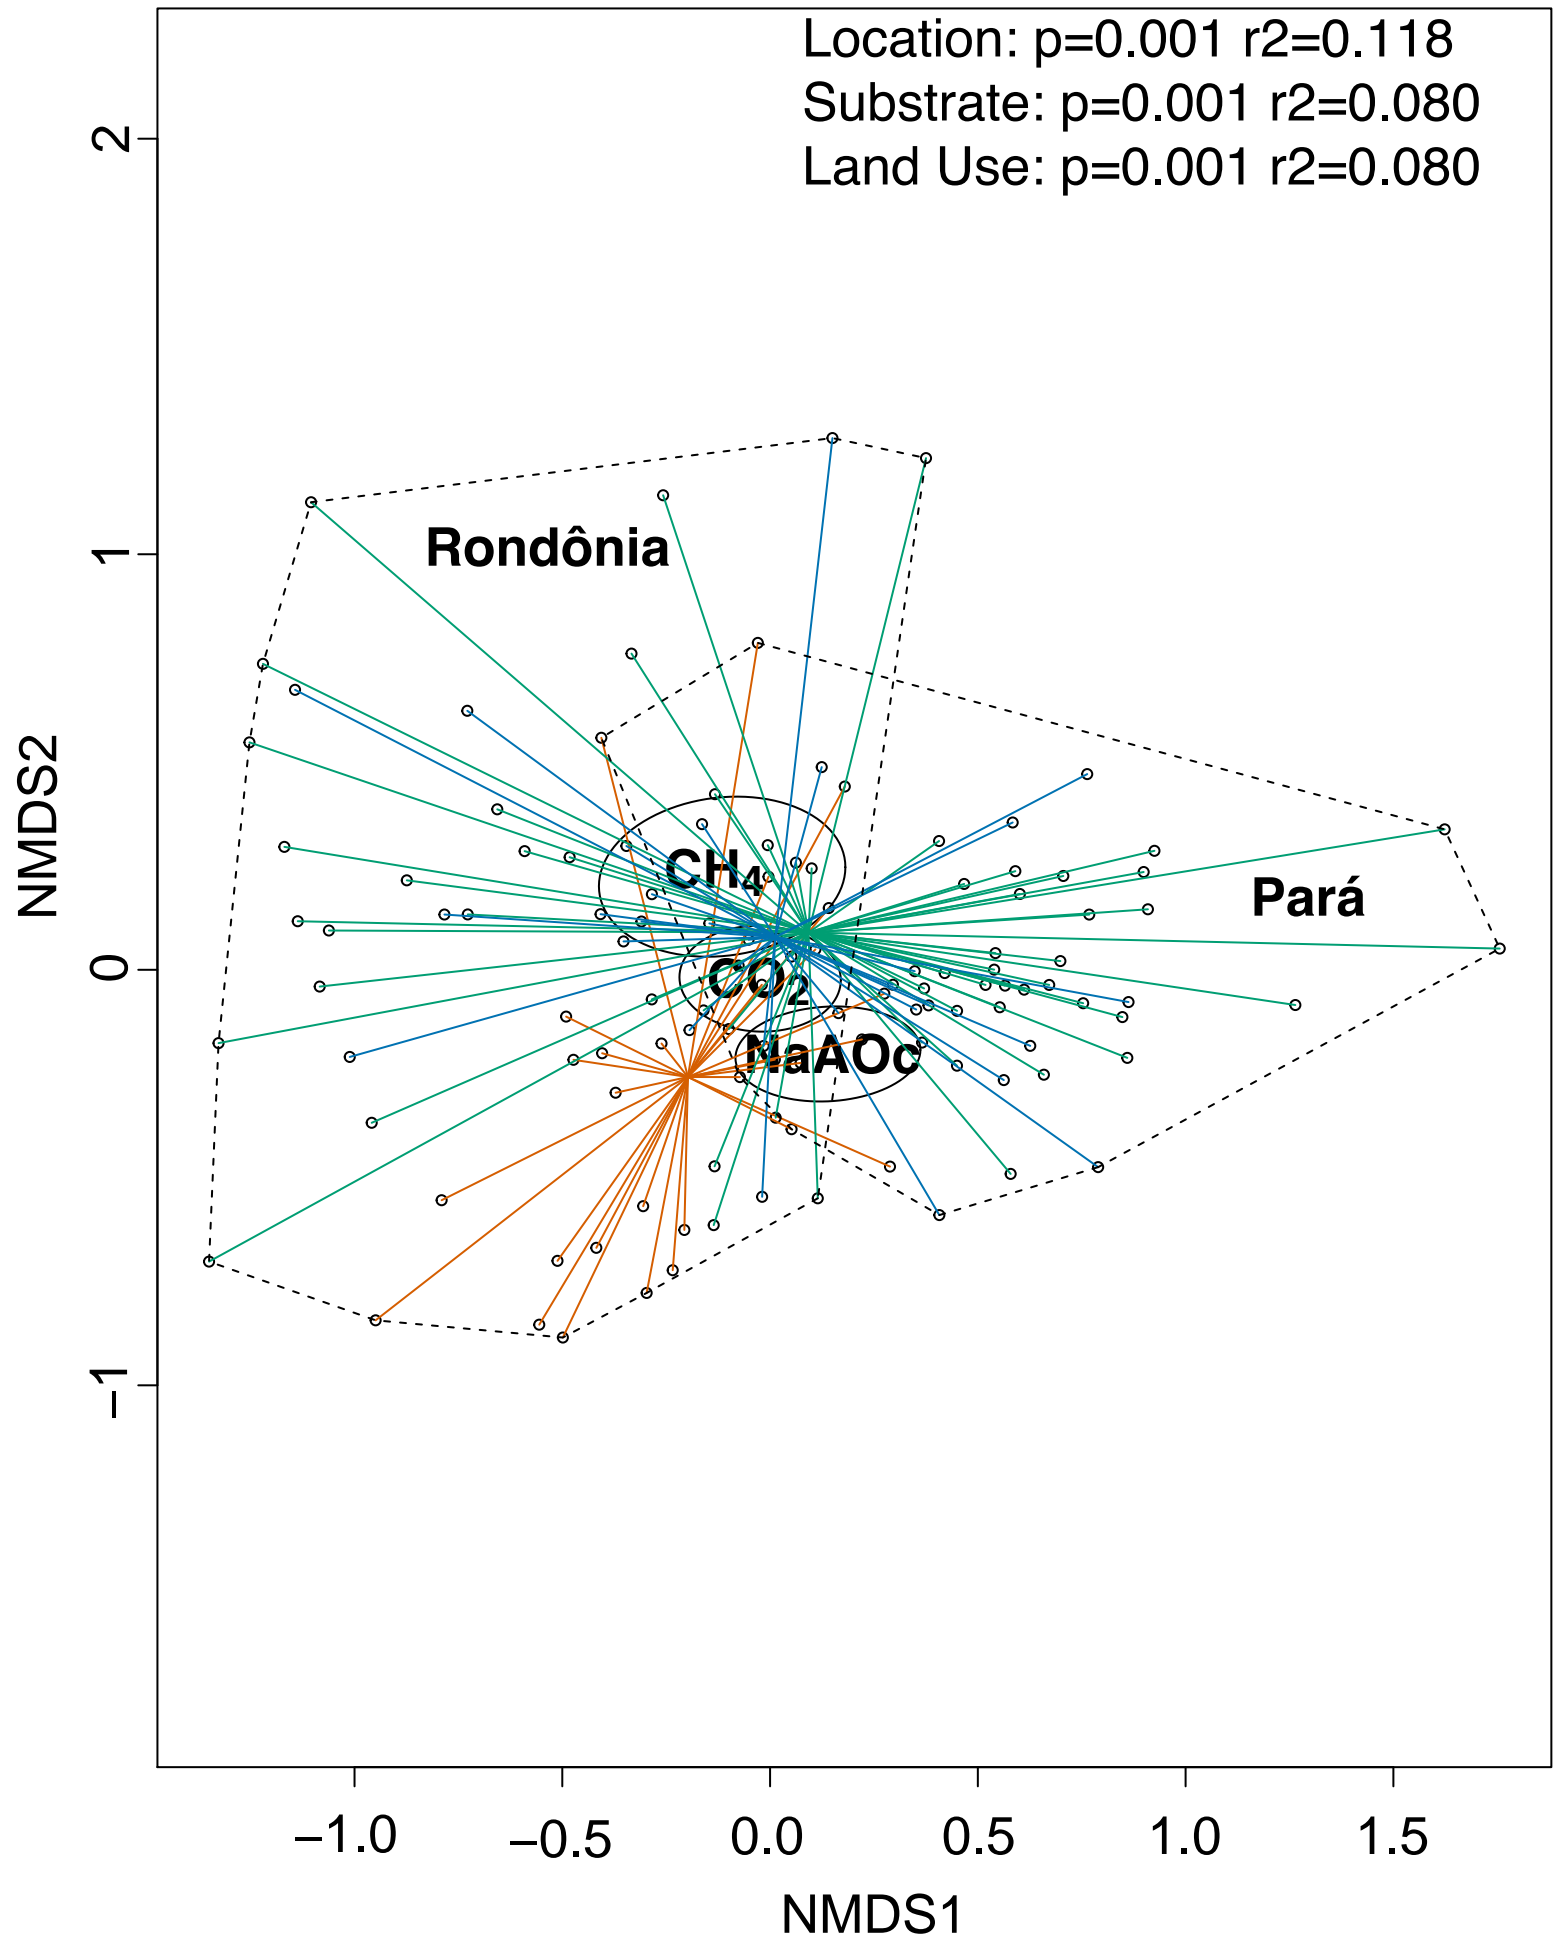



Para

Rondonia

Richness of Active Methane Cycling Taxa

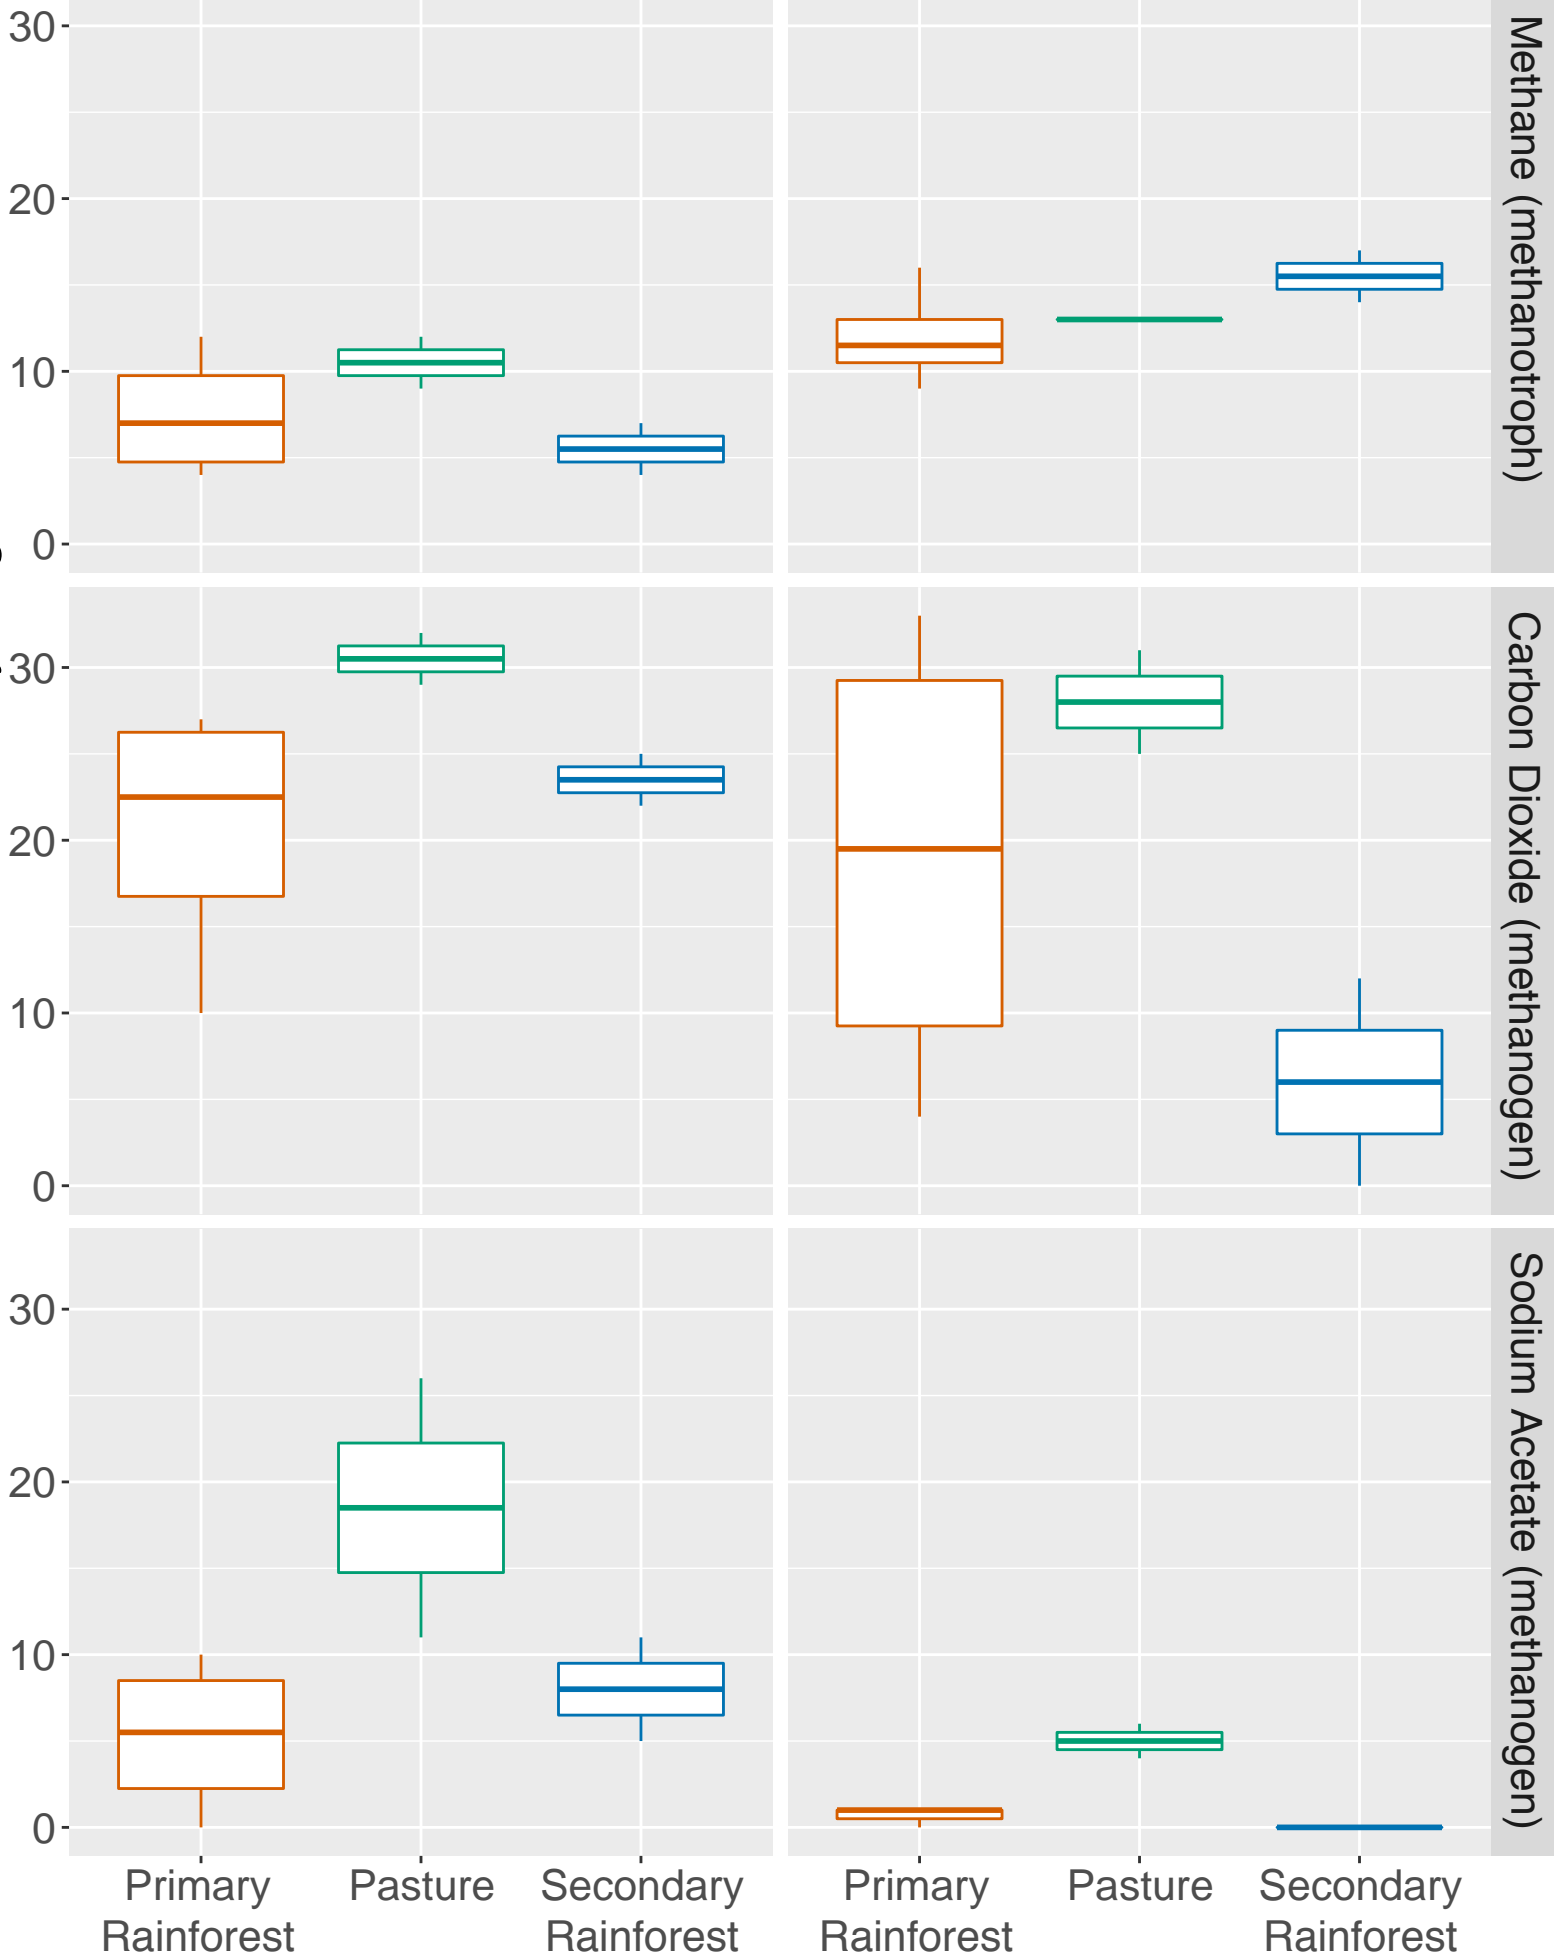

Genus

- Methanobacterium
- Methanobrevibacter
- Methanocaldococcus
- Methanococcoides
- Methanococcus
- Methanocorpusculum
- Methanoculleus
- Methanohalobium
- Methanoplanus
- Methanoregula
- Methanosaeta
- Methanosarcina
- Methanosphaera
- Methanosphaerula
- Methanospirillum
- Methanothermobacter
- Methanothermococcus
- Methanothermus

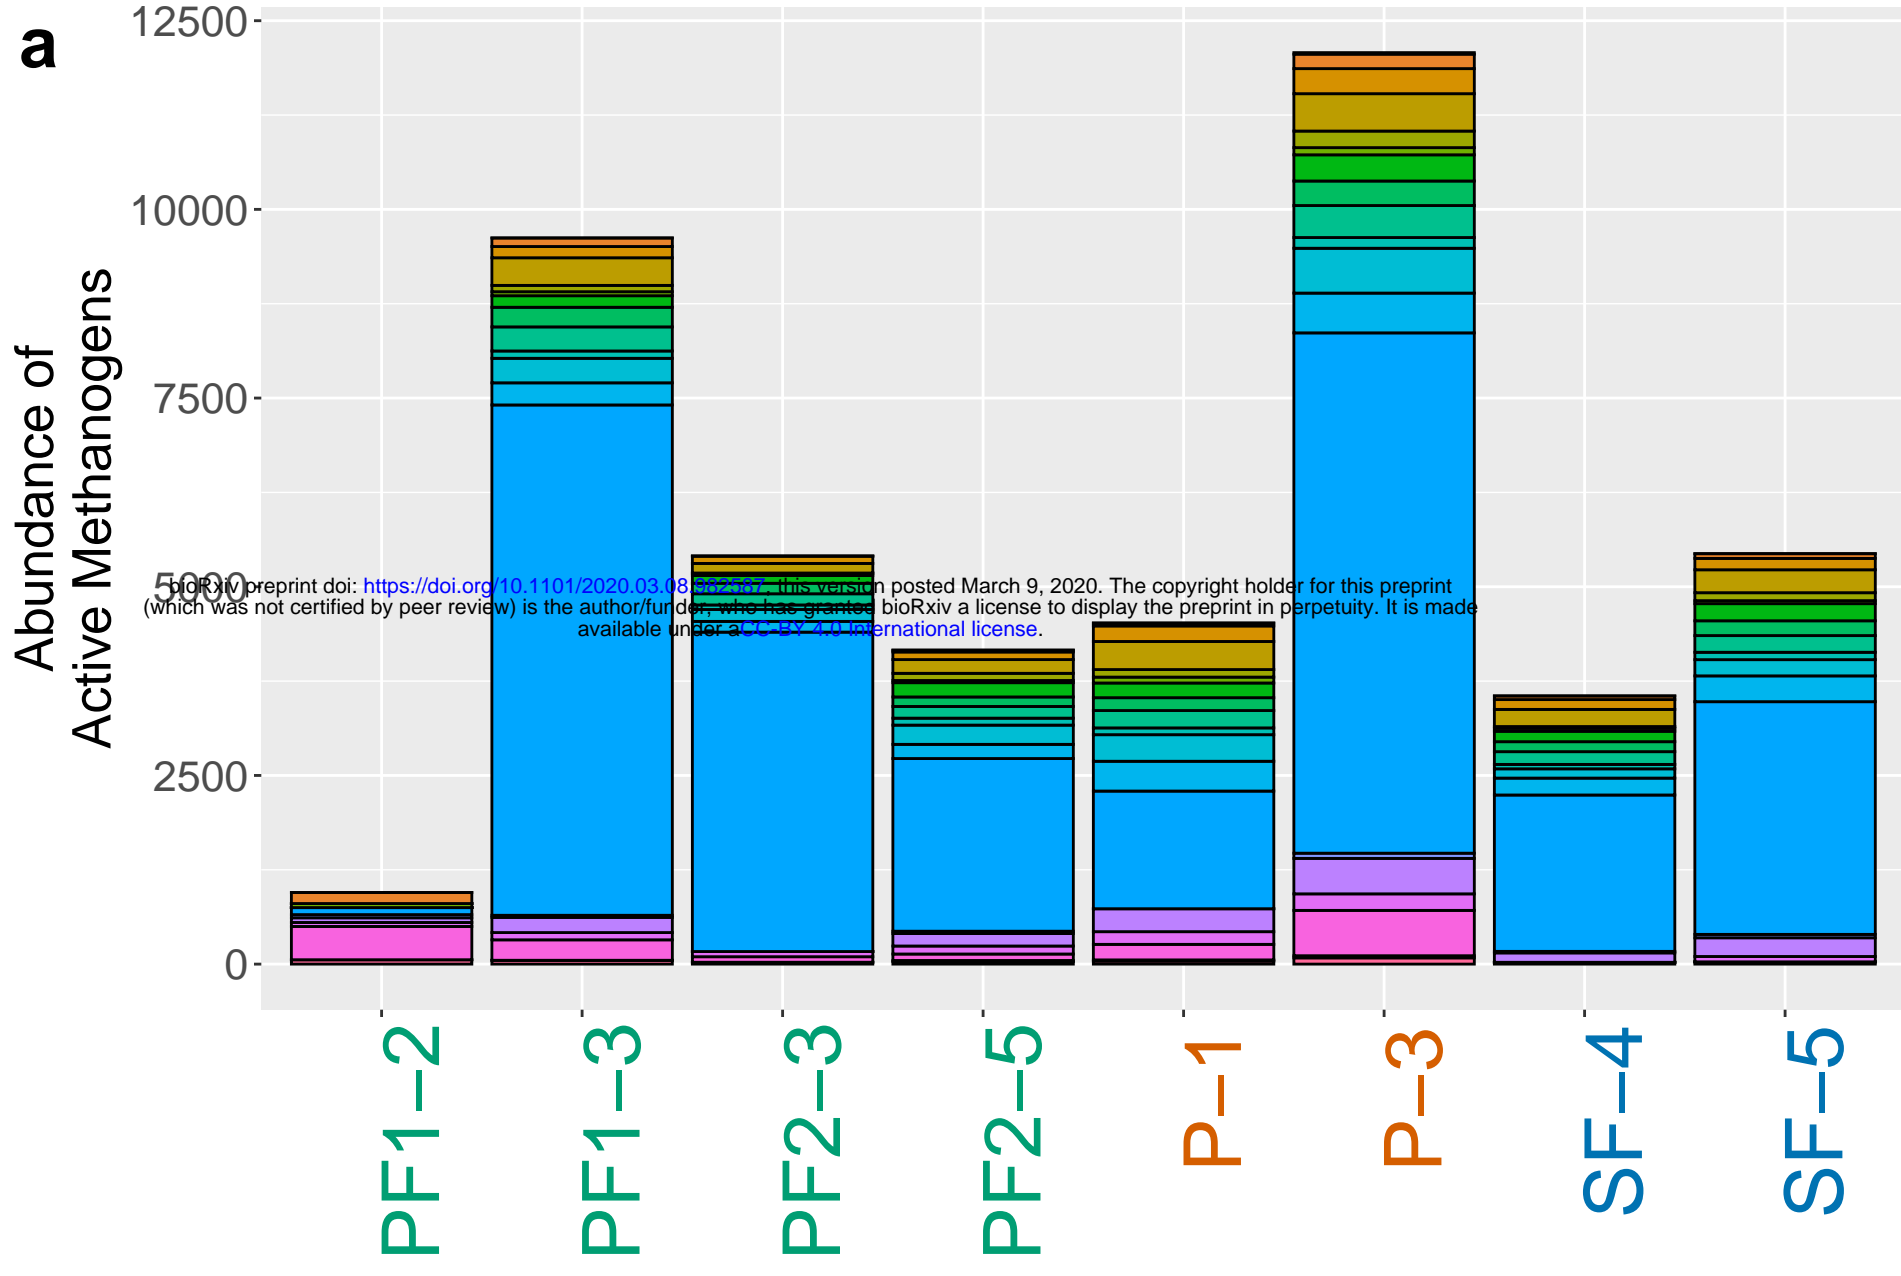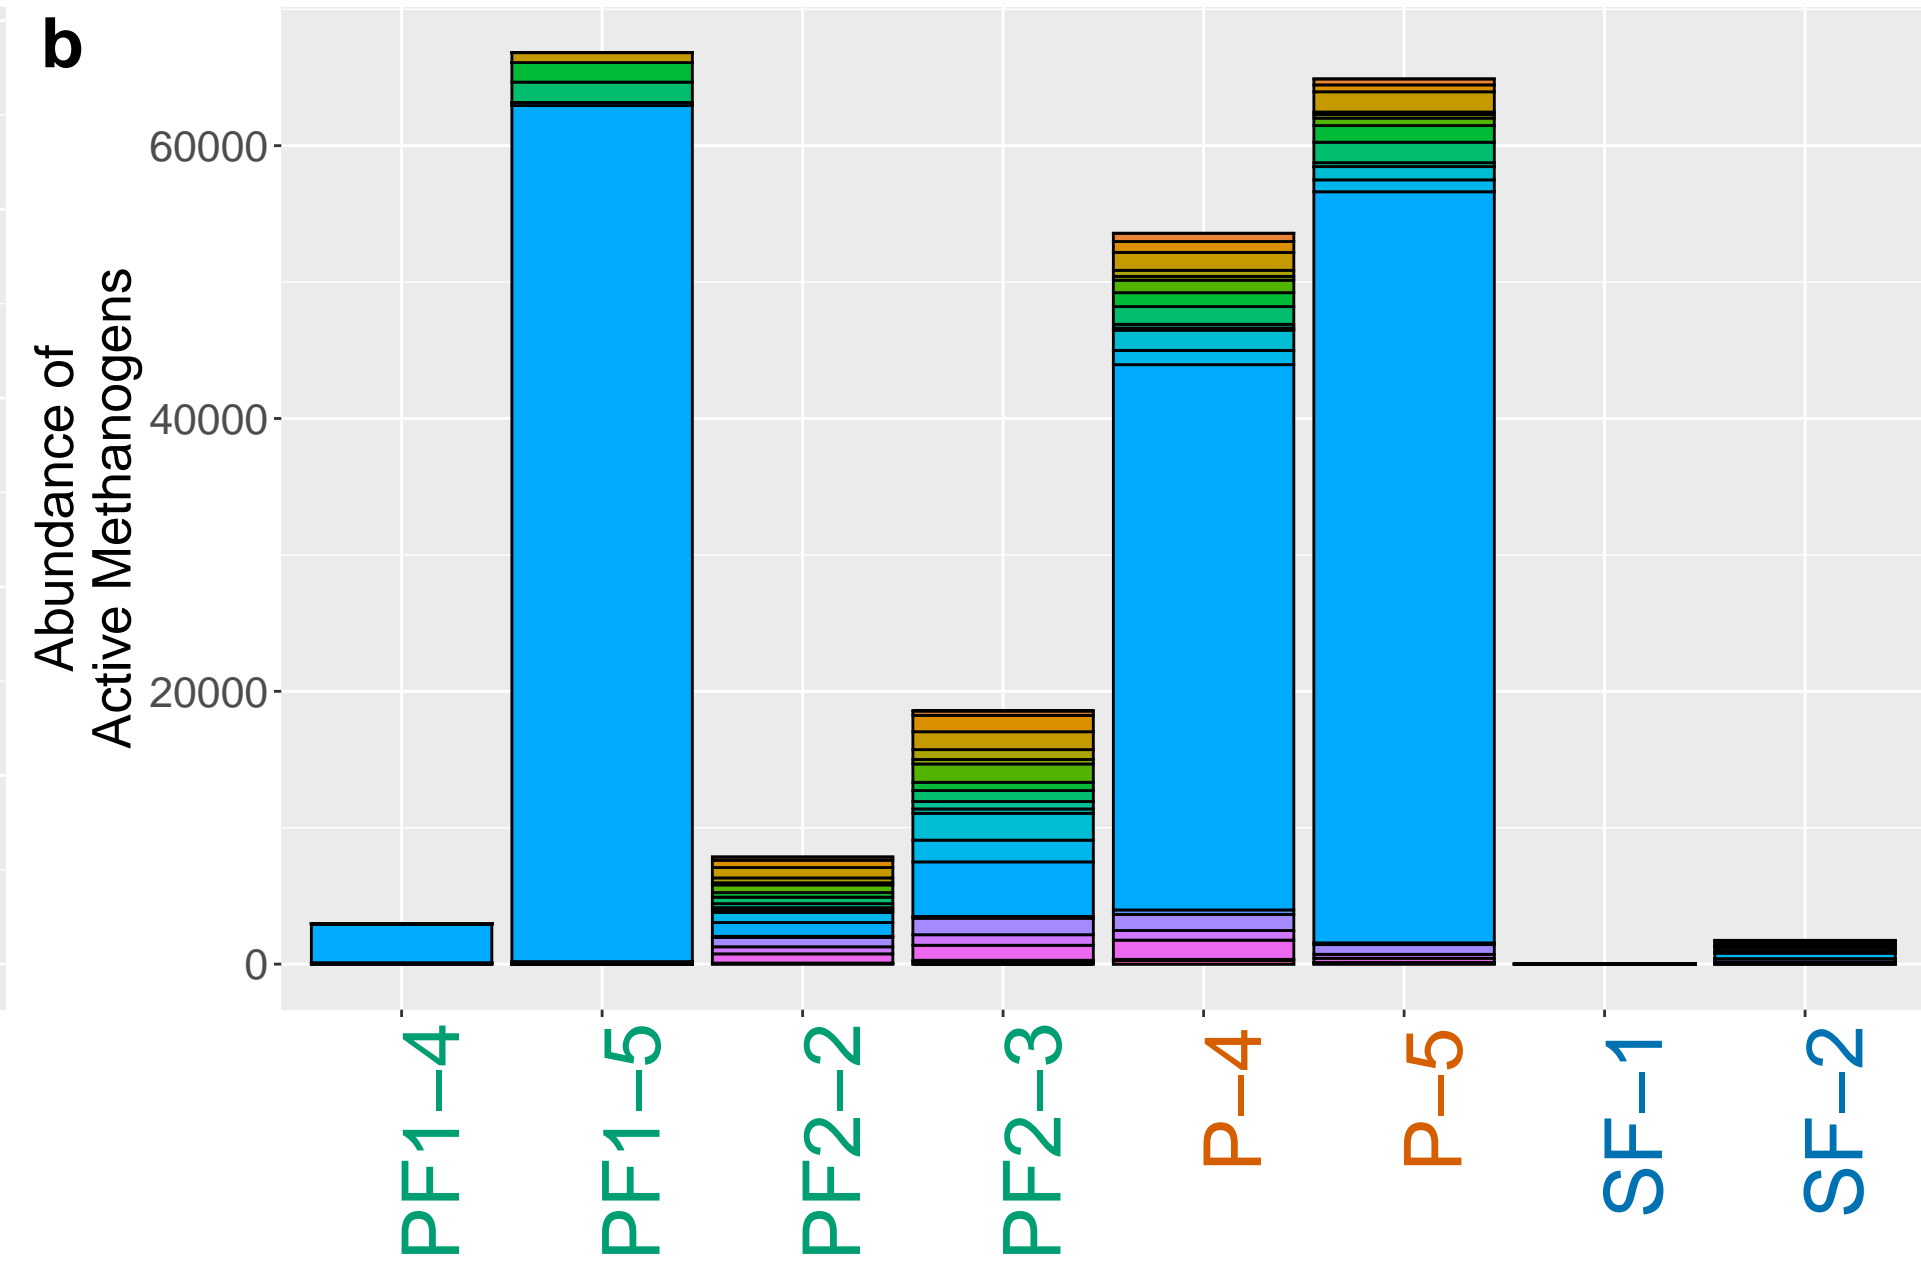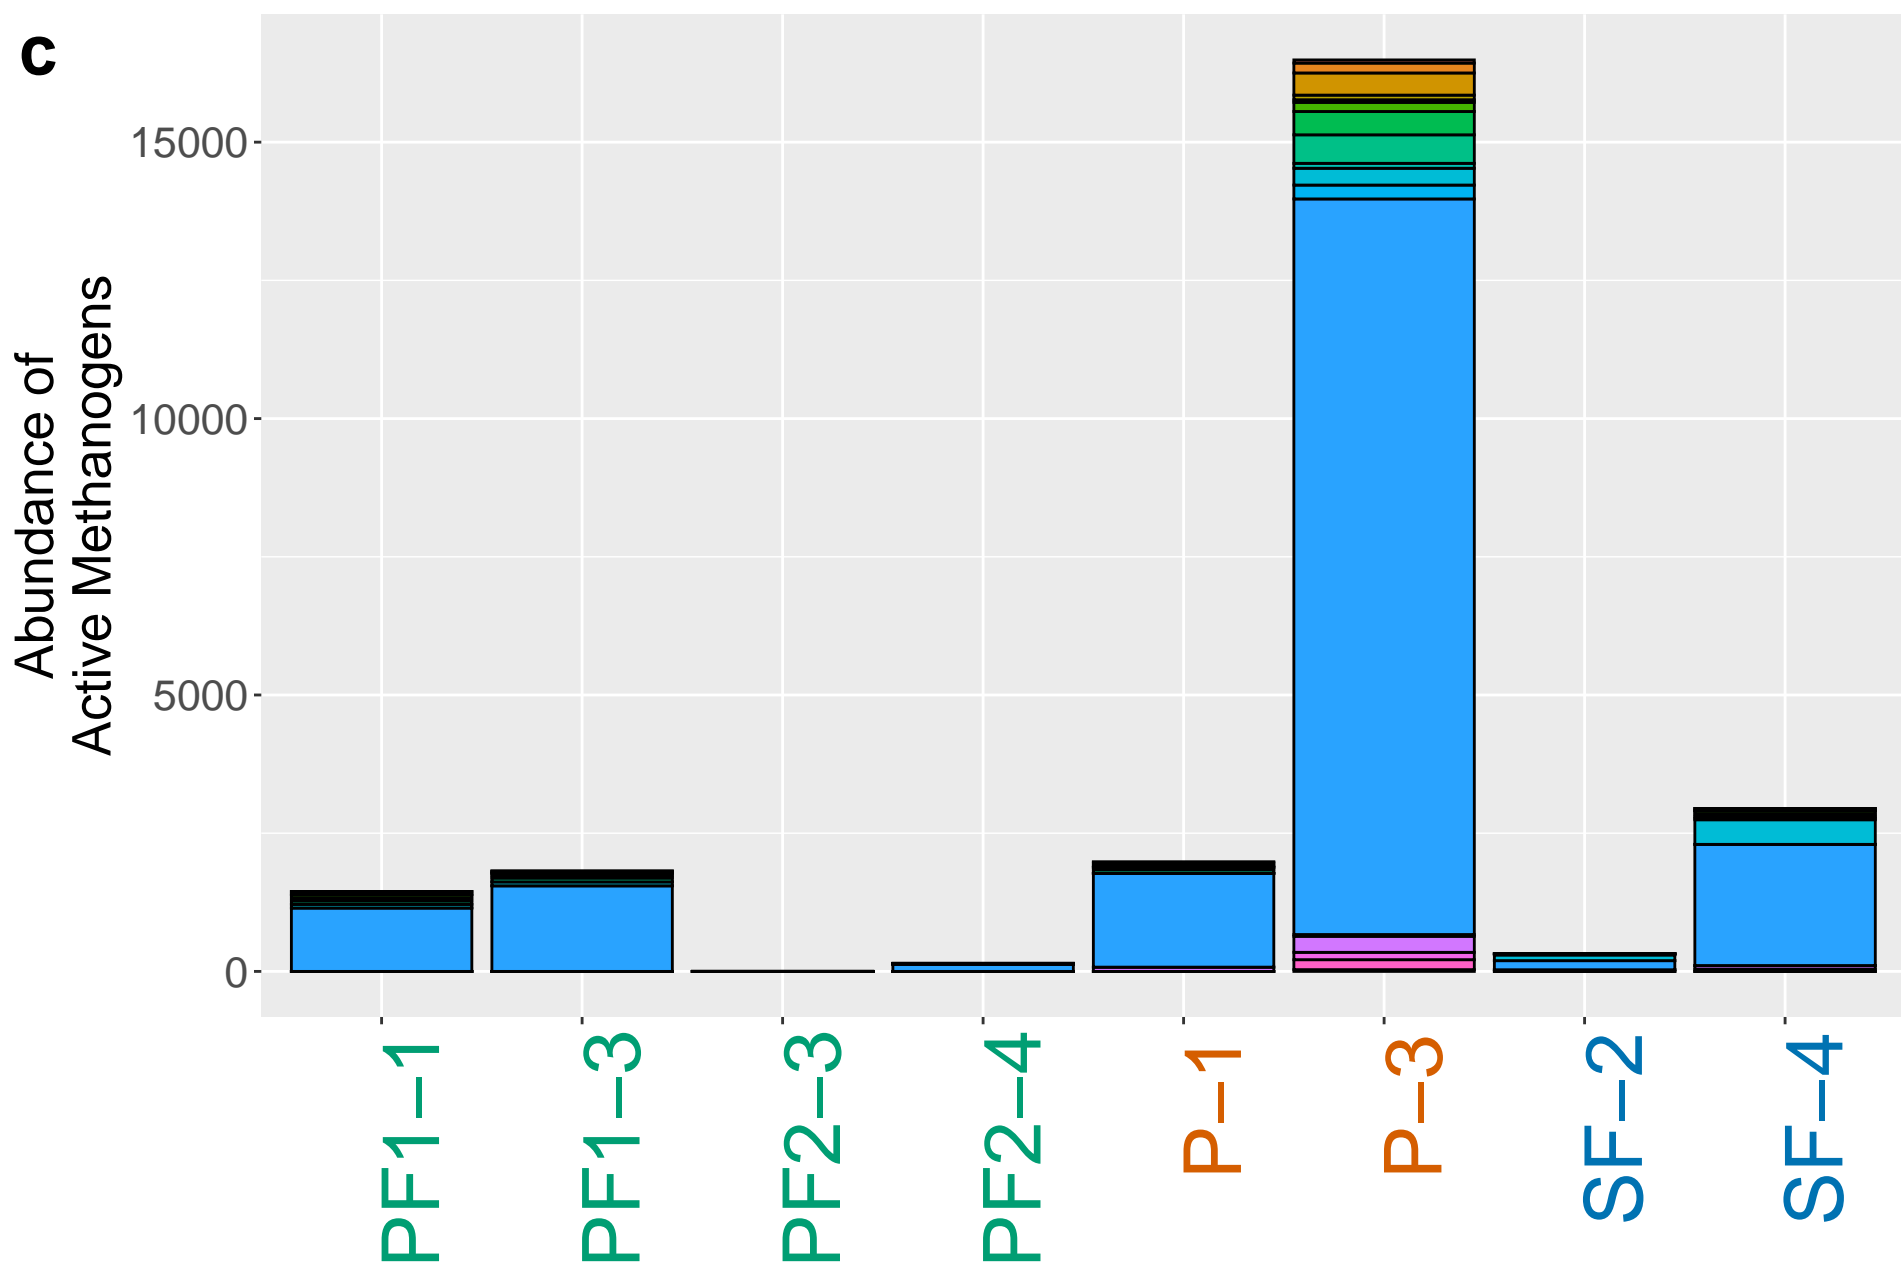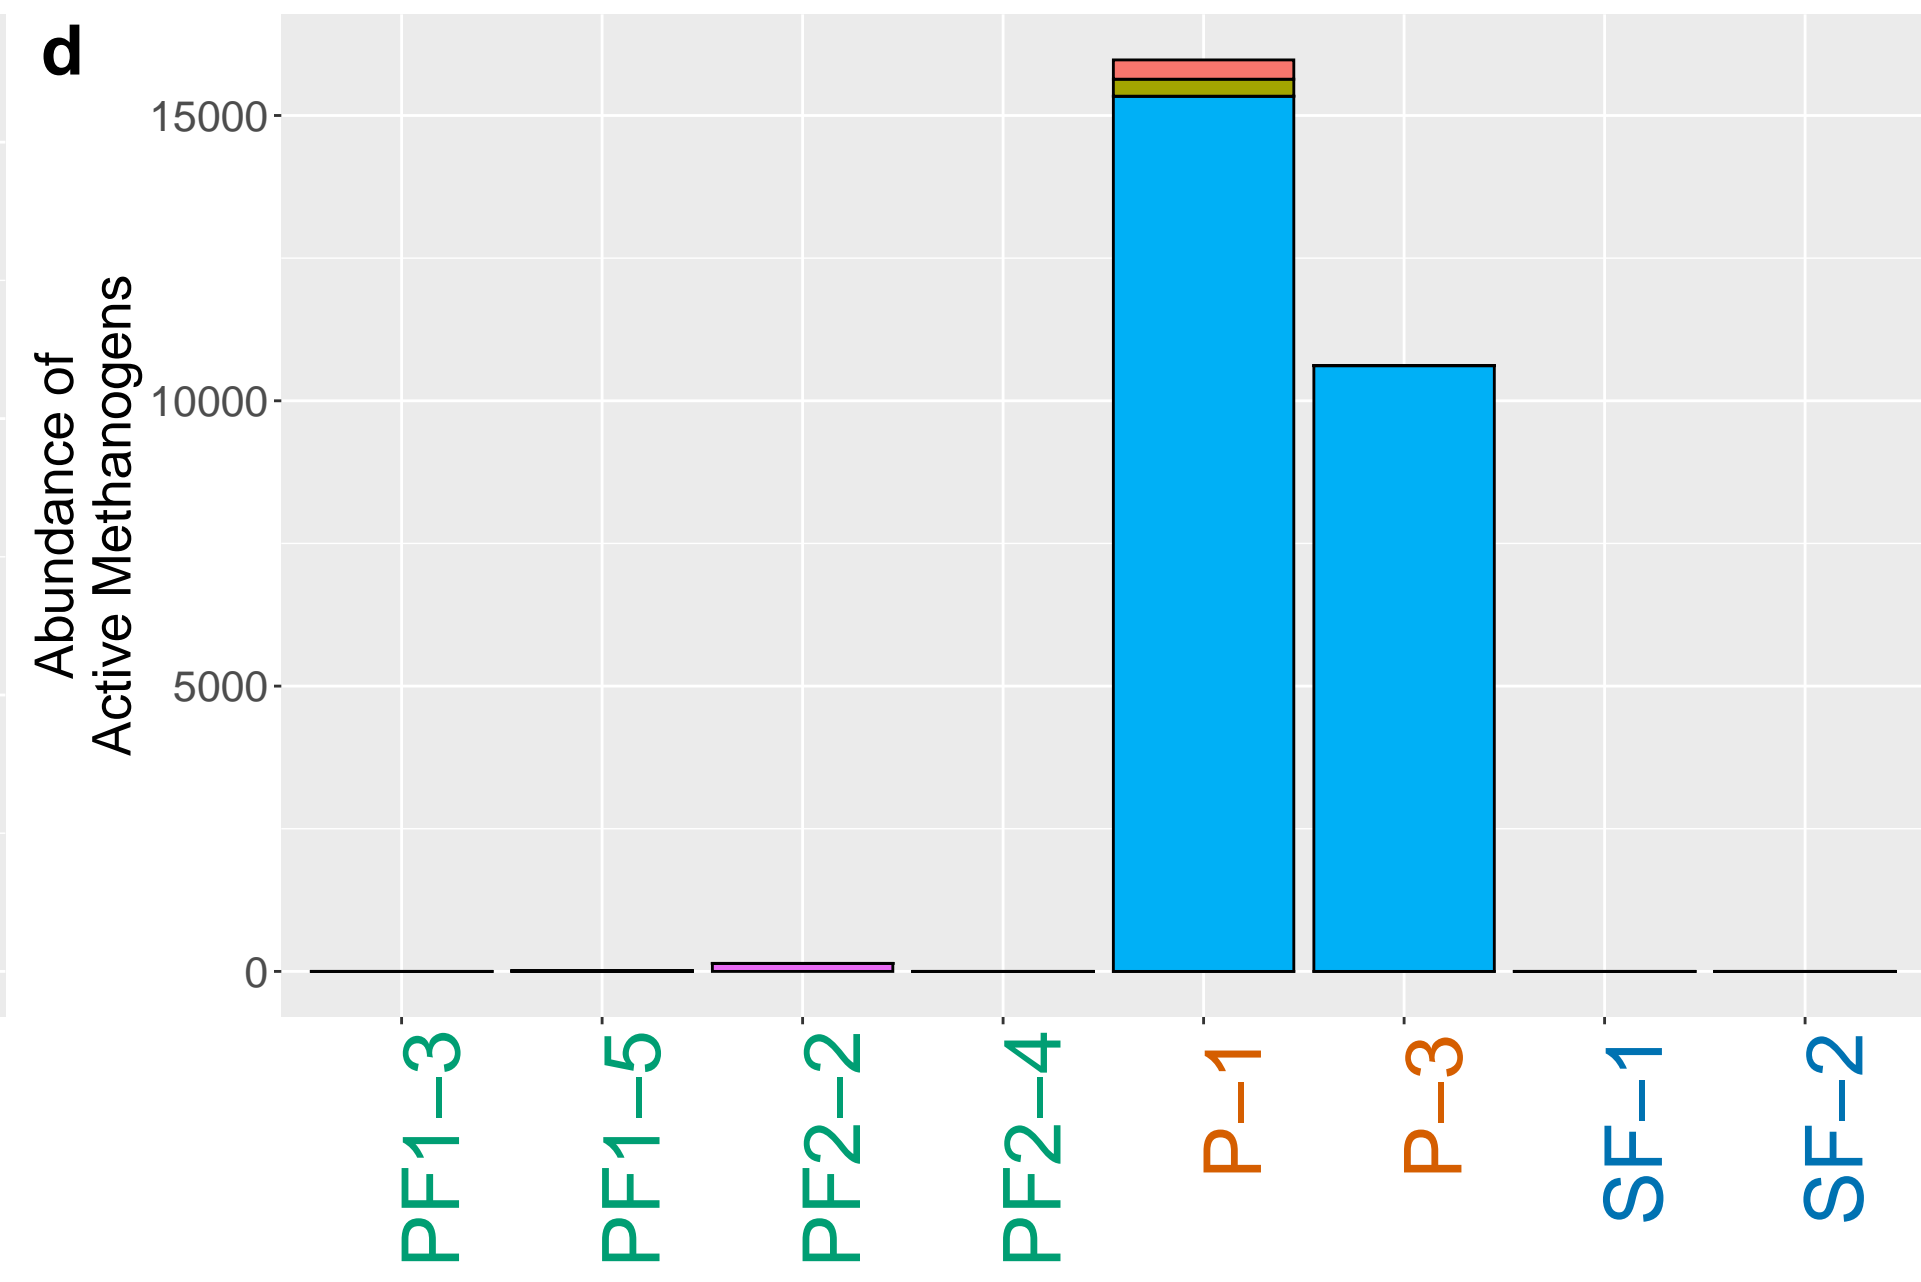

Methanotroph Relative Abundance

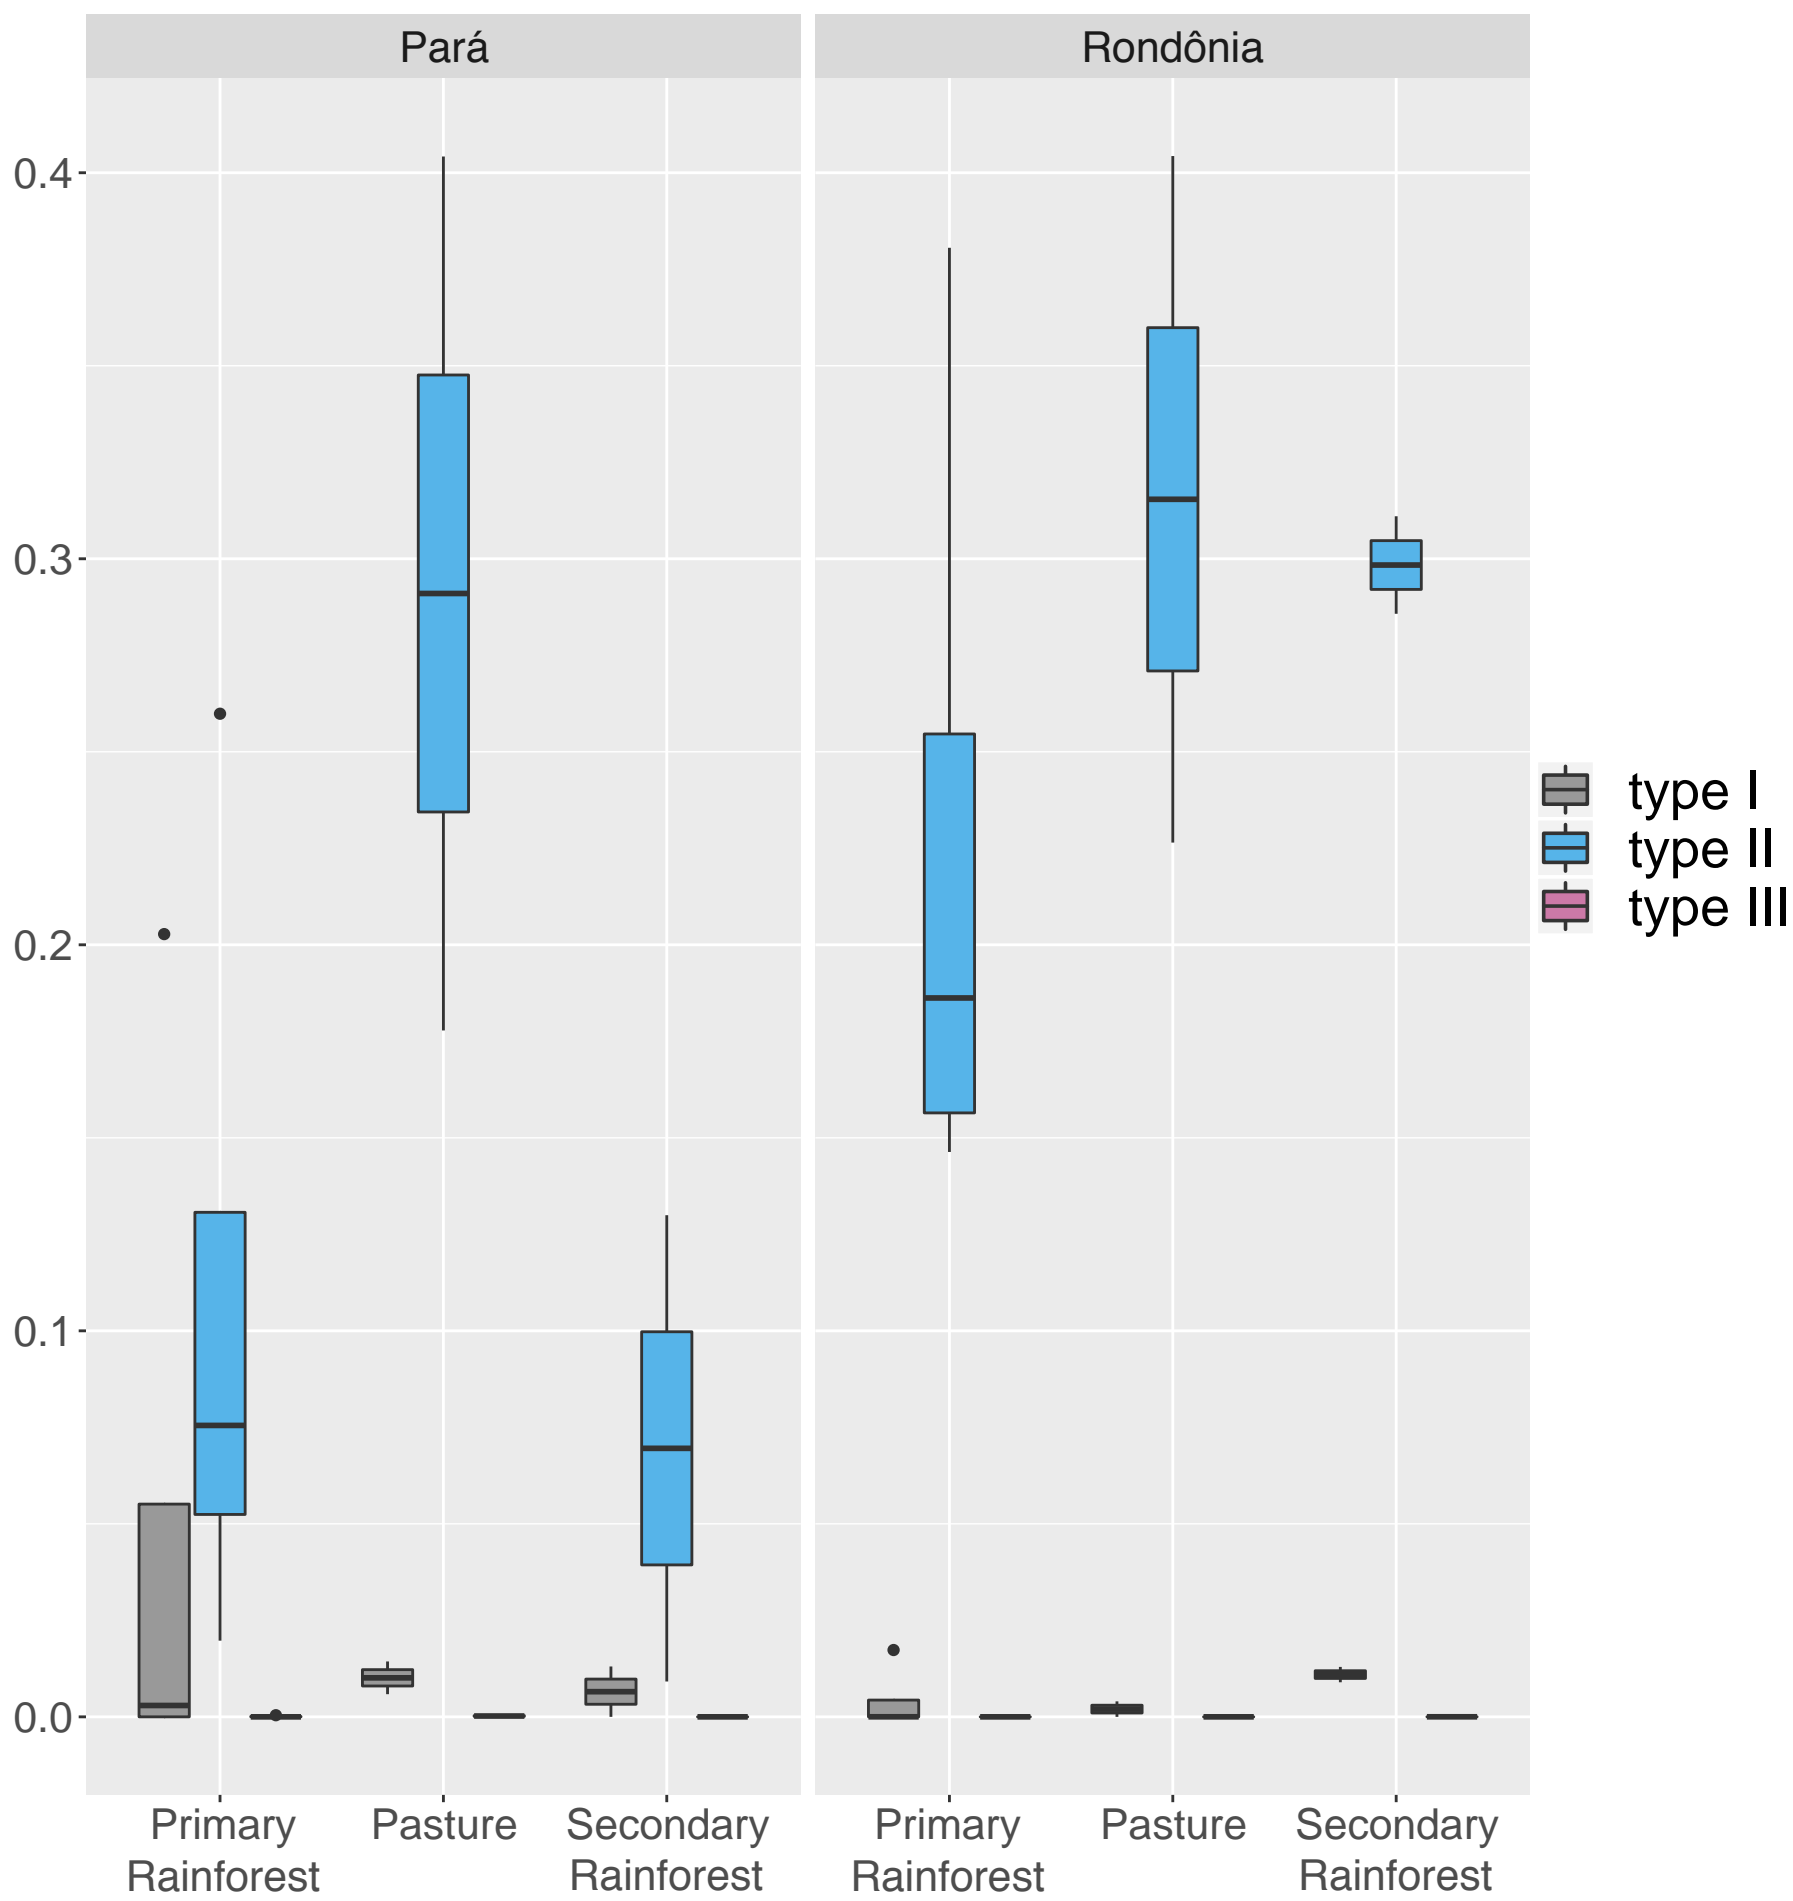

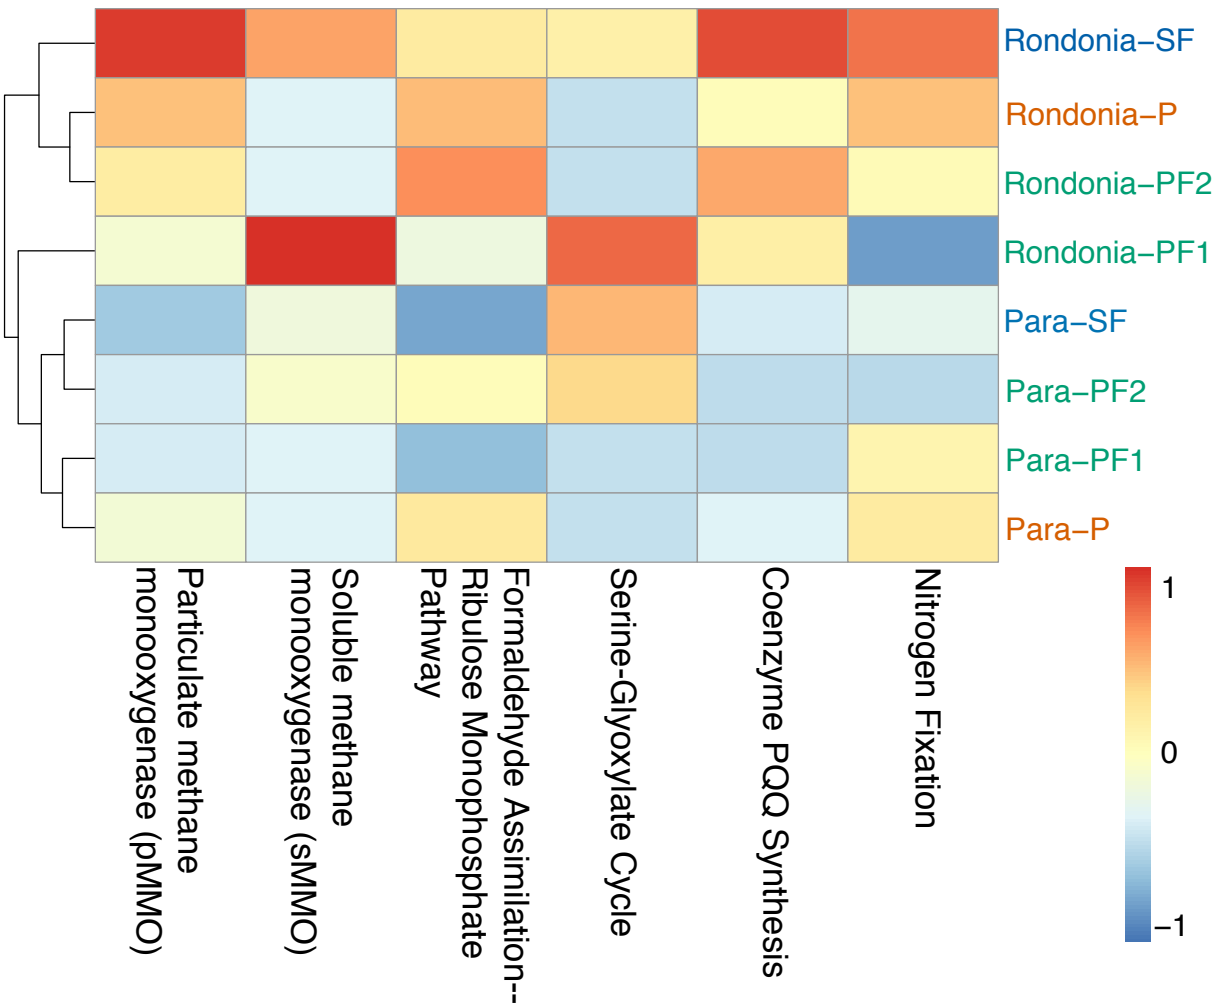

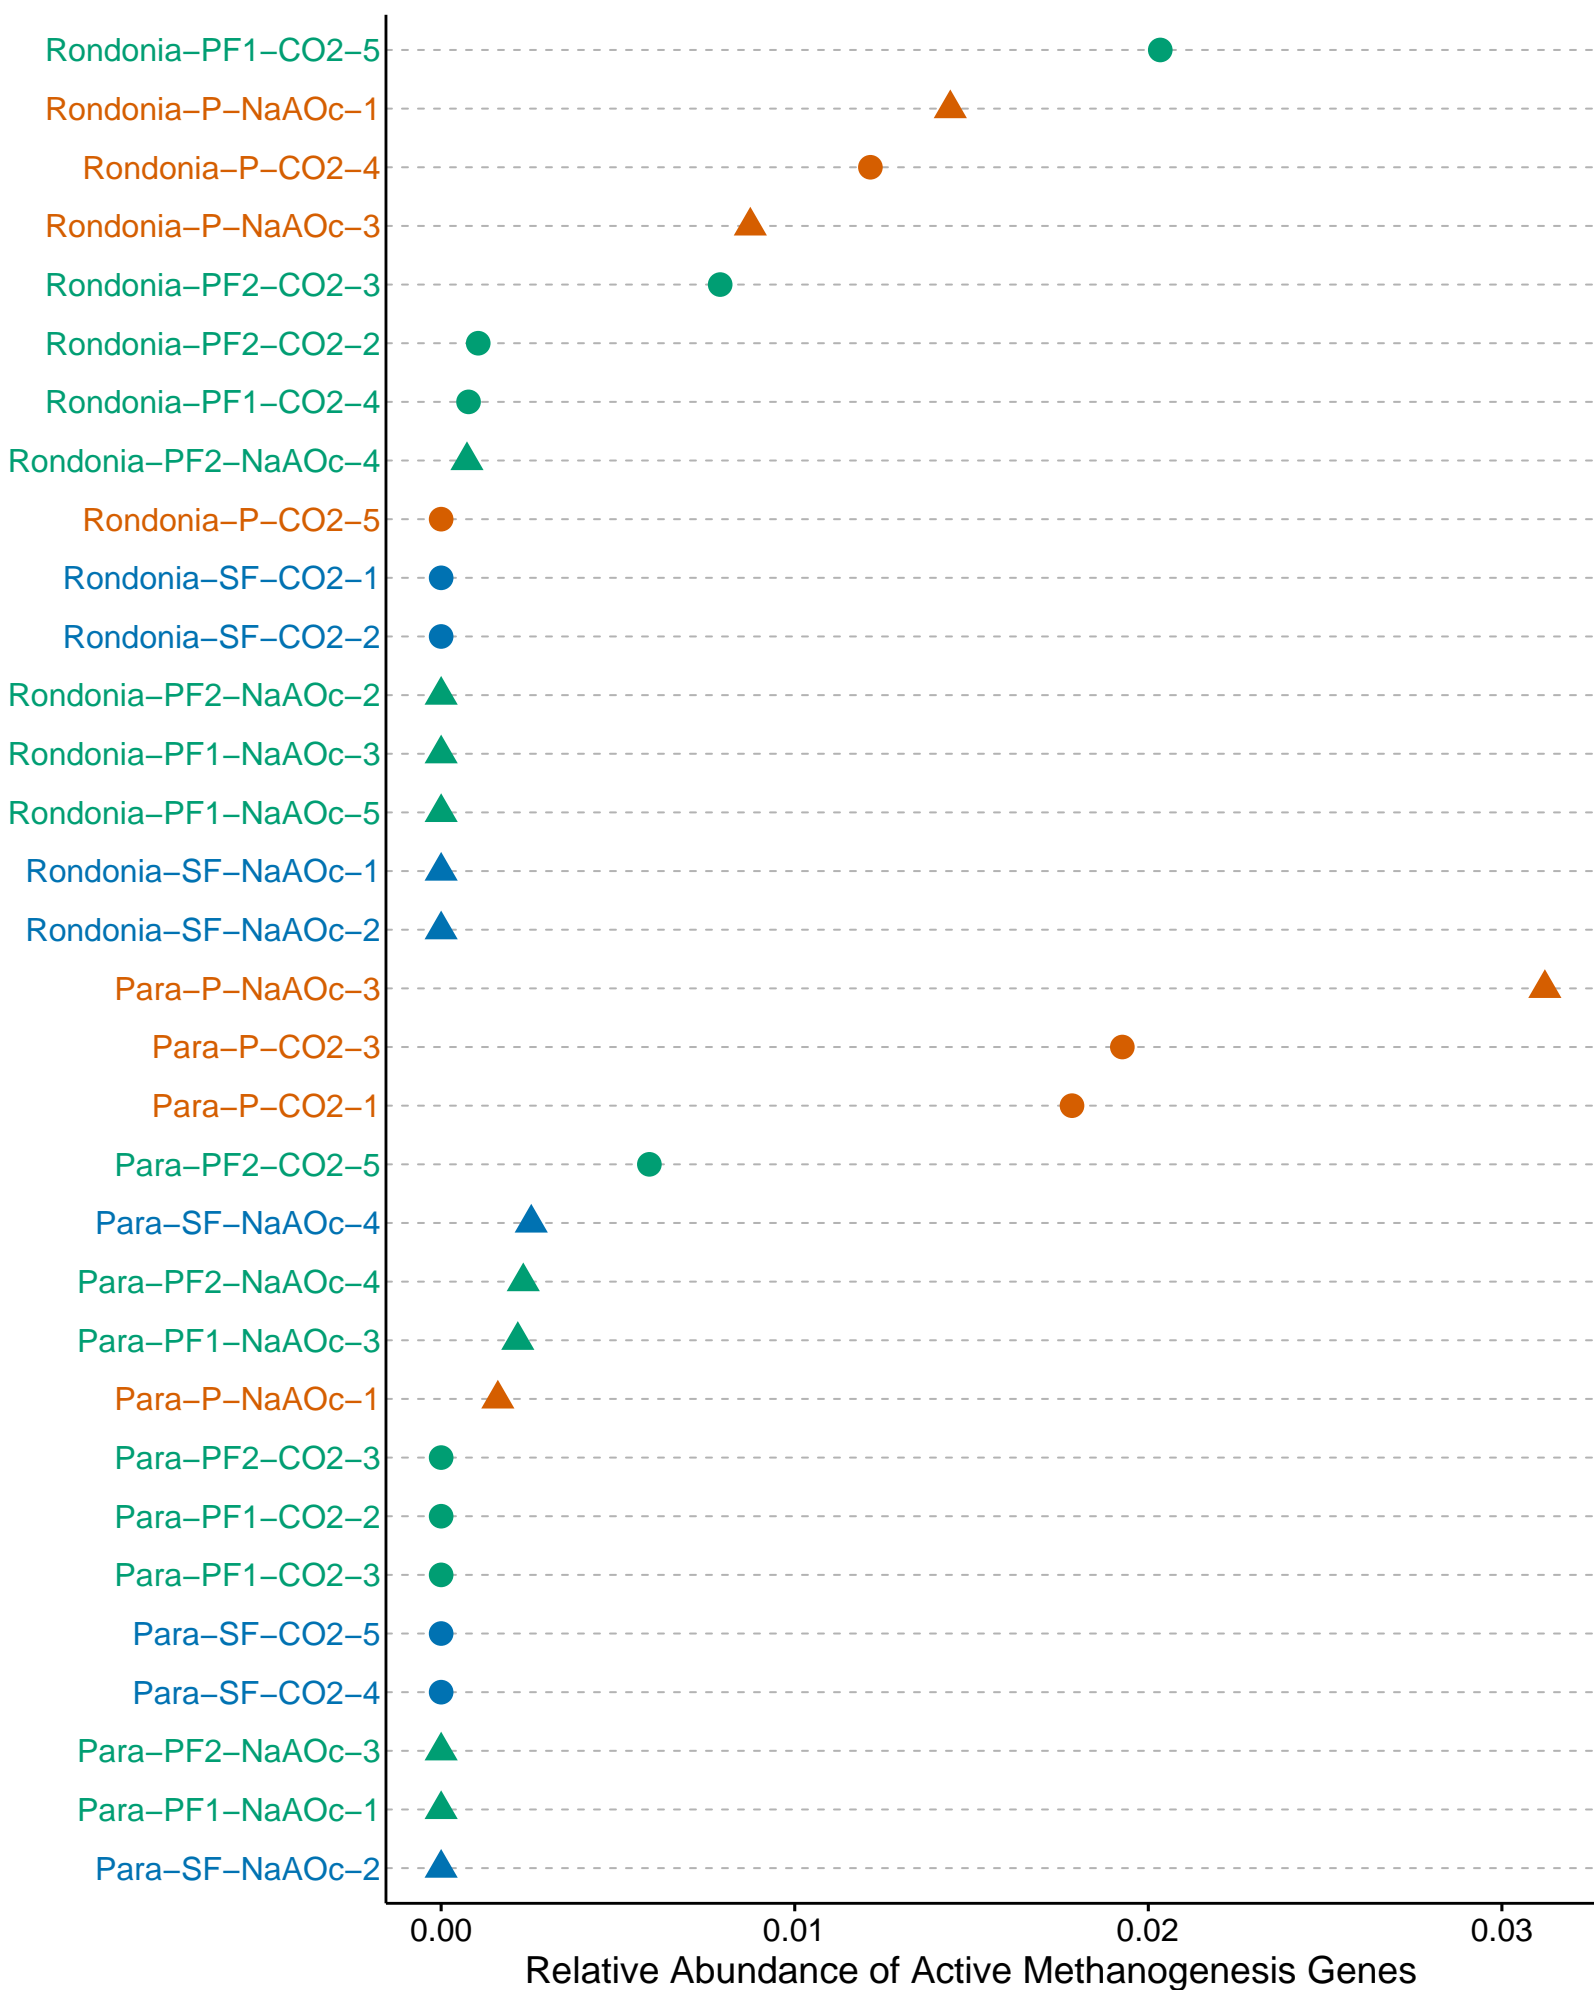

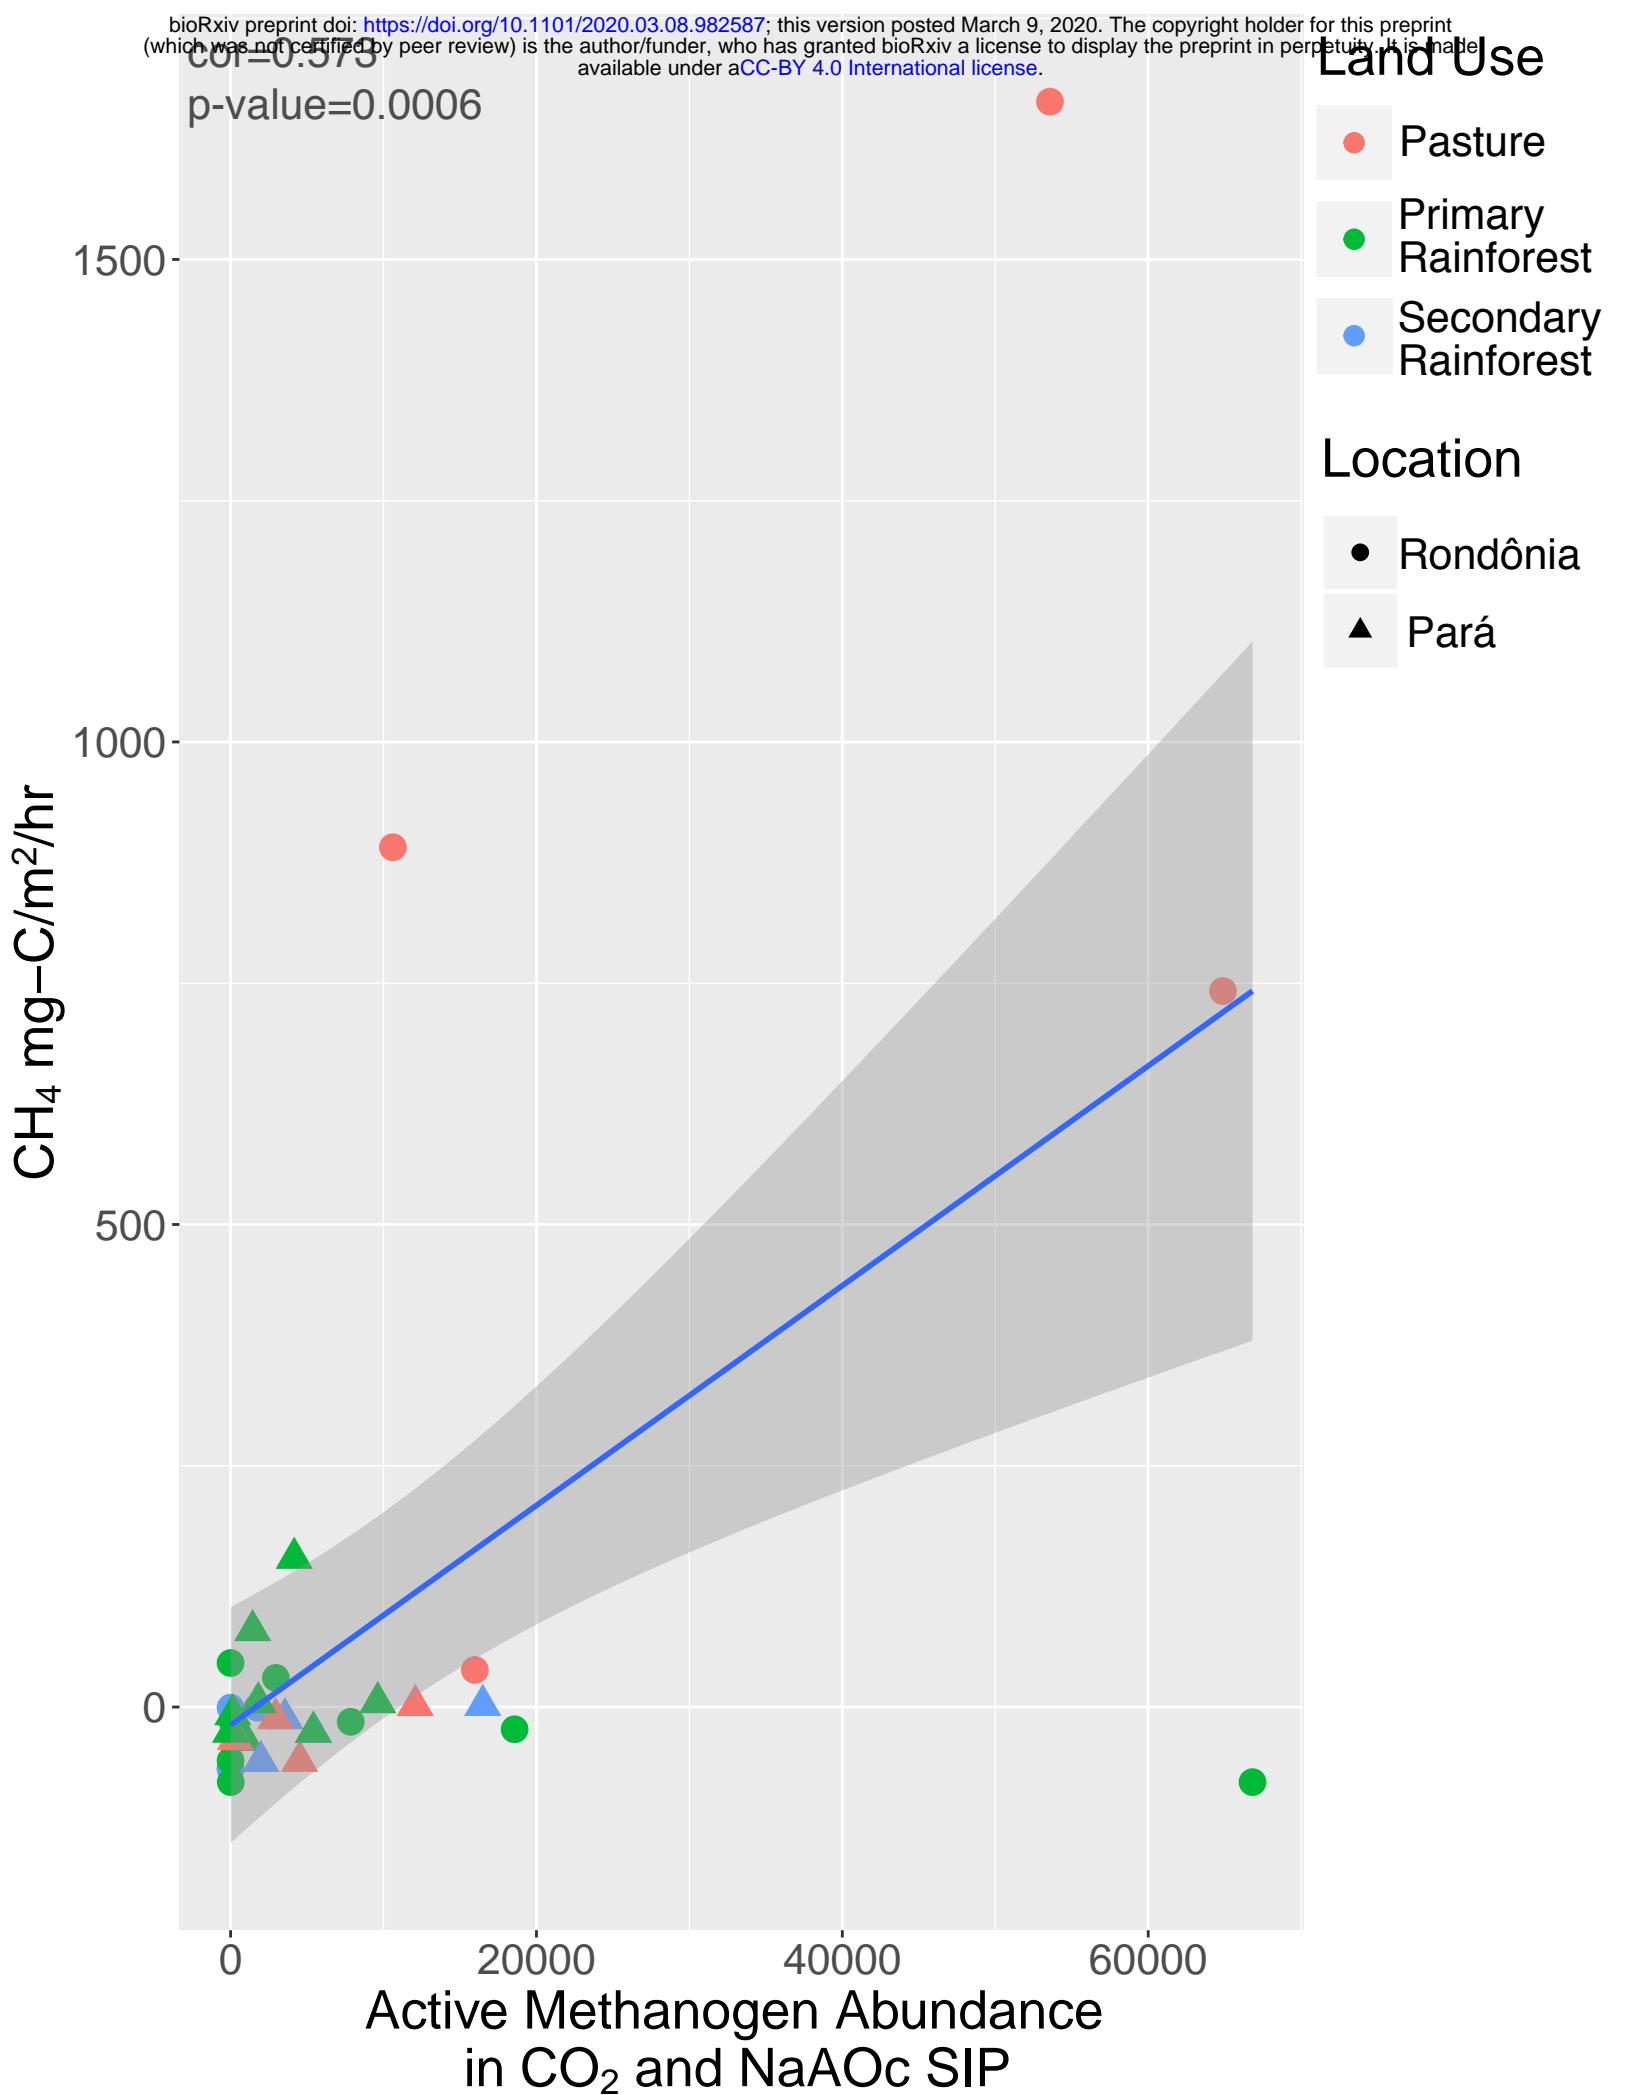

Source: https://www.biorxiv.org/content/10.1101/2020.03.08.982587v1.full.pdf
